# Supplementary material for: Variability of visual field maps in human early extrastriate cortex challenges the canonical model of organization of V2 and V3
Source: eLife journal article supplement (doi:10.7554/elife.86439), 2023-08-03
Supplement: supp1 [file elife-86439-supp1-v1.pdf]

# Results - Polar angle

## Mixed Model

### Model Info

---

| Info                  |                                                                                                                                                                                                                         |
|-----------------------|-------------------------------------------------------------------------------------------------------------------------------------------------------------------------------------------------------------------------|
| Estimate              | Linear mixed model fit by REML                                                                                                                                                                                          |
| Call                  | Mean difference from the average map ~ 1 + Hemisphere + Visual area + Half + Hemisphere:Visual area + Hemisphere:Half + Visual area:Half + Hemisphere:Visual area:Half+( 1 + Hemisphere + Visual area + Half   HCP_ID ) |
| AIC                   | 13759.810                                                                                                                                                                                                               |
| BIC                   | 13917.583                                                                                                                                                                                                               |
| LogLikel.             | -6851.224                                                                                                                                                                                                               |
| R-squared Marginal    | 0.203                                                                                                                                                                                                                   |
| R-squared Conditional | 0.578                                                                                                                                                                                                                   |
| Converged             | yes                                                                                                                                                                                                                     |
| Optimizer             | bobyqa                                                                                                                                                                                                                  |

---

Note. (Almost) singular fit. Maybe random coefficients variances are too small or correlations among them too large.

Note. boundary (singular) fit: see help('isSingular')

[3]

## Model Results

### Fixed Effect Omnibus tests

---

|                                 | F      | Num df | Den df | p      |
|---------------------------------|--------|--------|--------|--------|
| Hemisphere                      | 109.57 | 1      | 181    | < .001 |
| Visual area                     | 78.90  | 2      | 258    | < .001 |
| Half                            | 132.33 | 1      | 181    | < .001 |
| Hemisphere * Visual area        | 20.68  | 2      | 1440   | < .001 |
| Hemisphere * Half               | 176.74 | 1      | 1440   | < .001 |
| Visual area * Half              | 18.66  | 2      | 1440   | < .001 |
| Hemisphere * Visual area * Half | 6.65   | 2      | 1440   | 0.001  |

---

Note. Satterthwaite method for degrees of freedom

Fixed Effects Parameter Estimates

| Names                              | Effect                               | Estimate | SE    | 95% Confidence Interval |        | df   | t       | p      |
|------------------------------------|--------------------------------------|----------|-------|-------------------------|--------|------|---------|--------|
|                                    |                                      |          |       | Lower                   | Upper  |      |         |        |
| (Intercept)                        | (Intercept)                          | 18.584   | 0.300 | 17.995                  | 19.173 | 180  | 61.859  | < .001 |
| Hemisphere1                        | RH - LH                              | -3.347   | 0.320 | -3.974                  | -2.720 | 181  | -10.468 | < .001 |
| Visual area1                       | V2 - V1                              | 2.381    | 0.290 | 1.812                   | 2.950  | 210  | 8.206   | < .001 |
| Visual area2                       | V3 - V1                              | 3.985    | 0.318 | 3.363                   | 4.608  | 187  | 12.541  | < .001 |
| Half1                              | ventral - dorsal                     | -3.301   | 0.287 | -3.864                  | -2.739 | 181  | -11.504 | < .001 |
| Hemisphere1 * Visual area1         | RH - LH * V2 - V1                    | -1.273   | 0.503 | -2.260                  | -0.287 | 1440 | -2.529  | 0.012  |
| Hemisphere1 * Visual area2         | RH - LH * V3 - V1                    | 1.942    | 0.503 | 0.955                   | 2.929  | 1440 | 3.857   | < .001 |
| Hemisphere1 * Half1                | RH - LH * ventral - dorsal           | 5.465    | 0.411 | 4.659                   | 6.271  | 1440 | 13.295  | < .001 |
| Visual area1 * Half1               | V2 - V1 * ventral - dorsal           | 2.799    | 0.503 | 1.812                   | 3.786  | 1440 | 5.559   | < .001 |
| Visual area2 * Half1               | V3 - V1 * ventral - dorsal           | 2.504    | 0.503 | 1.518                   | 3.491  | 1440 | 4.974   | < .001 |
| Hemisphere1 * Visual area1 * Half1 | RH - LH * V2 - V1 * ventral - dorsal | 2.561    | 1.007 | 0.587                   | 4.534  | 1440 | 2.543   | 0.011  |
| Hemisphere1 * Visual area2 * Half1 | RH - LH * V3 - V1 * ventral - dorsal | -0.998   | 1.007 | -2.971                  | 0.976  | 1440 | -0.991  | 0.322  |

Random Components

| Groups   | Name         | SD   | Variance | ICC   |
|----------|--------------|------|----------|-------|
| HCP_ID   | (Intercept)  | 3.80 | 14.42    | 0.386 |
|          | Hemisphere1  | 3.30 | 10.86    |       |
|          | Visual area1 | 1.94 | 3.77     |       |
|          | Visual area2 | 2.61 | 6.81     |       |
|          | Half1        | 2.69 | 7.26     |       |
| Residual |              | 4.79 | 22.94    |       |

Note. Number of Obs: 2172 , groups: HCP\_ID 181

Random Parameters correlations

| Groups       | Param.1      | Param.2      | Corr.   |
|--------------|--------------|--------------|---------|
| HCP_ID       | (Intercept)  | Hemisphere1  | 0.1306  |
|              | (Intercept)  | Visual area1 | -0.3568 |
|              | (Intercept)  | Visual area2 | -0.1894 |
|              | (Intercept)  | Half1        | -0.1298 |
| Hemisphere1  | Visual area1 | -0.0893      |         |
| Hemisphere1  | Visual area2 | 0.2724       |         |
| Hemisphere1  | Half1        | -0.0742      |         |
| Visual area1 | Visual area2 | 0.8750       |         |
| Visual area1 | Half1        | 0.2956       |         |
| Visual area2 | Half1        | 0.5439       |         |

Post Hoc Tests

Post Hoc Comparisons - Hemisphere

| Comparison |            |            |       |      |     |                         |  |
|------------|------------|------------|-------|------|-----|-------------------------|--|
| Hemisphere | Hemisphere | Difference | SE    | t    | df  | P <sub>bonferroni</sub> |  |
| LH         | - RH       | 3.35       | 0.320 | 10.5 | 180 | < .001                  |  |

Post Hoc Comparisons - Visual area

| Comparison  |             |            |       |        |     |                         |  |
|-------------|-------------|------------|-------|--------|-----|-------------------------|--|
| Visual area | Visual area | Difference | SE    | t      | df  | P <sub>bonferroni</sub> |  |
| V1          | - V2        | -2.38      | 0.290 | -8.21  | 180 | < .001                  |  |
| V1          | - V3        | -3.99      | 0.318 | -12.54 | 180 | < .001                  |  |
| V2          | - V3        | -1.60      | 0.270 | -5.95  | 180 | < .001                  |  |

Post Hoc Comparisons - Half

| Comparison |           |            |       |      |     |                         |  |
|------------|-----------|------------|-------|------|-----|-------------------------|--|
| Half       | Half      | Difference | SE    | t    | df  | P <sub>bonferroni</sub> |  |
| dorsal     | - ventral | 3.30       | 0.287 | 11.5 | 180 | < .001                  |  |

Post Hoc Comparisons - Hemisphere \* Visual area

| Comparison |             |            |             |            |       |           |     |                         |  |
|------------|-------------|------------|-------------|------------|-------|-----------|-----|-------------------------|--|
| Hemisphere | Visual area | Hemisphere | Visual area | Difference | SE    | t         | df  | P <sub>bonferroni</sub> |  |
| LH         | V1          | - LH       | V2          | -3.01752   | 0.384 | -7.85547  | 512 | < .001                  |  |
| LH         | V1          | - LH       | V3          | -3.01448   | 0.405 | -7.43566  | 451 | < .001                  |  |
| LH         | V1          | - RH       | V1          | 3.56989    | 0.432 | 8.26137   | 547 | < .001                  |  |
| LH         | V1          | - RH       | V2          | 1.82575    | 0.449 | 4.06999   | 224 | < .001                  |  |
| LH         | V1          | - RH       | V3          | -1.38641   | 0.500 | -2.77163  | 214 | 0.091                   |  |
| LH         | V2          | - LH       | V3          | 0.00305    | 0.369 | 0.00825   | 568 | 1.000                   |  |
| LH         | V2          | - RH       | V2          | 4.84328    | 0.432 | 11.20822  | 547 | < .001                  |  |
| LH         | V2          | - RH       | V3          | 1.63111    | 0.478 | 3.41319   | 218 | 0.011                   |  |
| LH         | V3          | - RH       | V3          | 1.62807    | 0.432 | 3.76764   | 547 | 0.003                   |  |
| RH         | V1          | - LH       | V2          | -6.58741   | 0.462 | -14.24498 | 221 | < .001                  |  |
| RH         | V1          | - LH       | V3          | -6.58436   | 0.445 | -14.77990 | 225 | < .001                  |  |
| RH         | V1          | - RH       | V2          | -1.74413   | 0.384 | -4.54048  | 512 | < .001                  |  |
| RH         | V1          | - RH       | V3          | -4.95630   | 0.405 | -12.22545 | 451 | < .001                  |  |
| RH         | V2          | - LH       | V3          | -4.84023   | 0.405 | -11.95180 | 236 | < .001                  |  |
| RH         | V2          | - RH       | V3          | -3.21216   | 0.369 | -8.70360  | 568 | < .001                  |  |

Post Hoc Comparisons - Hemisphere \* Half

| Comparison |         |            |         | Difference | SE    | t      | df  | P <sub>bonferroni</sub> |
|------------|---------|------------|---------|------------|-------|--------|-----|-------------------------|
| Hemisphere | Half    | Hemisphere | Half    |            |       |        |     |                         |
| LH         | dorsal  | - LH       | ventral | 6.0338     | 0.353 | 17.094 | 397 | < .001                  |
| LH         | dorsal  | - RH       | dorsal  | 6.0796     | 0.380 | 15.995 | 351 | < .001                  |
| LH         | dorsal  | - RH       | ventral | 6.6483     | 0.421 | 15.789 | 180 | < .001                  |
| LH         | ventral | - RH       | ventral | 0.6145     | 0.380 | 1.617  | 351 | 0.641                   |
| RH         | dorsal  | - LH       | ventral | -0.0459    | 0.438 | -0.105 | 180 | 1.000                   |
| RH         | dorsal  | - RH       | ventral | 0.5686     | 0.353 | 1.611  | 397 | 0.648                   |

Post Hoc Comparisons - Visual area \* Half

| Comparison  |         |             |         | Difference | SE    | t       | df  | P <sub>bonferroni</sub> |
|-------------|---------|-------------|---------|------------|-------|---------|-----|-------------------------|
| Visual area | Half    | Visual area | Half    |            |       |         |     |                         |
| V1          | dorsal  | - V1        | ventral | 5.069      | 0.408 | 12.410  | 642 | < .001                  |
| V1          | dorsal  | - V2        | dorsal  | -0.981     | 0.384 | -2.555  | 512 | 0.164                   |
| V1          | dorsal  | - V2        | ventral | 1.289      | 0.452 | 2.848   | 223 | 0.072                   |
| V1          | dorsal  | - V3        | dorsal  | -2.733     | 0.405 | -6.742  | 451 | < .001                  |
| V1          | dorsal  | - V3        | ventral | -0.169     | 0.497 | -0.340  | 215 | 1.000                   |
| V1          | ventral | - V2        | ventral | -3.780     | 0.384 | -9.841  | 512 | < .001                  |
| V1          | ventral | - V3        | ventral | -5.238     | 0.405 | -12.919 | 451 | < .001                  |
| V2          | dorsal  | - V1        | ventral | 6.050      | 0.413 | 14.649  | 234 | < .001                  |
| V2          | dorsal  | - V2        | ventral | 2.270      | 0.408 | 5.558   | 642 | < .001                  |
| V2          | dorsal  | - V3        | dorsal  | -1.752     | 0.369 | -4.747  | 568 | < .001                  |
| V2          | dorsal  | - V3        | ventral | 0.813      | 0.449 | 1.811   | 224 | 1.000                   |
| V2          | ventral | - V3        | ventral | -1.457     | 0.369 | -3.949  | 568 | 0.001                   |
| V3          | dorsal  | - V1        | ventral | 7.802      | 0.403 | 19.372  | 237 | < .001                  |
| V3          | dorsal  | - V2        | ventral | 4.022      | 0.389 | 10.345  | 242 | < .001                  |
| V3          | dorsal  | - V3        | ventral | 2.565      | 0.408 | 6.279   | 642 | < .001                  |

Post Hoc Comparisons - Hemisphere \* Visual area \* Half

| Comparison |             |         |            |             |         | Difference | SE    | t       | df   | Pbonferroni |
|------------|-------------|---------|------------|-------------|---------|------------|-------|---------|------|-------------|
| Hemisphere | Visual area | Half    | Hemisphere | Visual area | Half    |            |       |         |      |             |
| LH         | V1          | dorsal  | - LH       | V1          | ventral | 7.541      | 0.542 | 13.918  | 1179 | < .001      |
| LH         | V1          | dorsal  | - LH       | V2          | dorsal  | -2.258     | 0.524 | -4.312  | 1106 | 0.001       |
| LH         | V1          | dorsal  | - LH       | V2          | ventral | 3.764      | 0.576 | 6.538   | 537  | < .001      |
| LH         | V1          | dorsal  | - LH       | V3          | dorsal  | -1.513     | 0.540 | -2.804  | 993  | 0.340       |
| LH         | V1          | dorsal  | - LH       | V3          | ventral | 3.025      | 0.611 | 4.950   | 465  | < .001      |
| LH         | V1          | dorsal  | - RH       | V1          | dorsal  | 6.042      | 0.560 | 10.791  | 1051 | < .001      |
| LH         | V1          | dorsal  | - RH       | V1          | ventral | 8.639      | 0.588 | 14.680  | 608  | < .001      |
| LH         | V1          | dorsal  | - RH       | V2          | dorsal  | 6.337      | 0.573 | 11.066  | 544  | < .001      |
| LH         | V1          | dorsal  | - RH       | V2          | ventral | 4.855      | 0.615 | 7.898   | 339  | < .001      |
| LH         | V1          | dorsal  | - RH       | V3          | dorsal  | 2.088      | 0.614 | 3.401   | 460  | 0.048       |
| LH         | V1          | dorsal  | - RH       | V3          | ventral | 2.680      | 0.672 | 3.986   | 302  | 0.006       |
| LH         | V1          | ventral | - LH       | V2          | ventral | -3.777     | 0.524 | -7.211  | 1106 | < .001      |
| LH         | V1          | ventral | - LH       | V3          | ventral | -4.516     | 0.540 | -8.370  | 993  | < .001      |
| LH         | V1          | ventral | - RH       | V1          | ventral | 1.098      | 0.560 | 1.961   | 1051 | 1.000       |
| LH         | V1          | ventral | - RH       | V2          | ventral | -2.686     | 0.573 | -4.690  | 544  | < .001      |
| LH         | V1          | ventral | - RH       | V3          | ventral | -4.861     | 0.614 | -7.918  | 460  | < .001      |
| LH         | V2          | dorsal  | - LH       | V1          | ventral | 9.799      | 0.545 | 17.971  | 625  | < .001      |
| LH         | V2          | dorsal  | - LH       | V2          | ventral | 6.023      | 0.542 | 11.115  | 1179 | < .001      |
| LH         | V2          | dorsal  | - LH       | V3          | dorsal  | 0.746      | 0.513 | 1.454   | 1189 | 1.000       |
| LH         | V2          | dorsal  | - LH       | V3          | ventral | 5.283      | 0.573 | 9.222   | 544  | < .001      |
| LH         | V2          | dorsal  | - RH       | V1          | ventral | 10.897     | 0.597 | 18.255  | 355  | < .001      |
| LH         | V2          | dorsal  | - RH       | V2          | dorsal  | 8.596      | 0.560 | 15.353  | 1051 | < .001      |
| LH         | V2          | dorsal  | - RH       | V2          | ventral | 7.113      | 0.588 | 12.088  | 608  | < .001      |
| LH         | V2          | dorsal  | - RH       | V3          | dorsal  | 4.347      | 0.596 | 7.294   | 493  | < .001      |
| LH         | V2          | dorsal  | - RH       | V3          | ventral | 4.938      | 0.643 | 7.683   | 320  | < .001      |
| LH         | V2          | ventral | - LH       | V3          | ventral | -0.739     | 0.513 | -1.442  | 1189 | 1.000       |
| LH         | V2          | ventral | - RH       | V2          | ventral | 1.091      | 0.560 | 1.948   | 1051 | 1.000       |
| LH         | V2          | ventral | - RH       | V3          | ventral | -1.085     | 0.596 | -1.820  | 493  | 1.000       |
| LH         | V3          | dorsal  | - LH       | V1          | ventral | 9.054      | 0.538 | 16.843  | 653  | < .001      |
| LH         | V3          | dorsal  | - LH       | V2          | ventral | 5.277      | 0.527 | 10.011  | 694  | < .001      |
| LH         | V3          | dorsal  | - LH       | V3          | ventral | 4.538      | 0.542 | 8.375   | 1179 | < .001      |
| LH         | V3          | dorsal  | - RH       | V1          | ventral | 10.152     | 0.562 | 18.065  | 392  | < .001      |
| LH         | V3          | dorsal  | - RH       | V2          | ventral | 6.368      | 0.546 | 11.657  | 414  | < .001      |
| LH         | V3          | dorsal  | - RH       | V3          | dorsal  | 3.601      | 0.560 | 6.432   | 1051 | < .001      |
| LH         | V3          | dorsal  | - RH       | V3          | ventral | 4.193      | 0.588 | 7.125   | 608  | < .001      |
| LH         | V3          | ventral | - RH       | V3          | ventral | -0.345     | 0.560 | -0.616  | 1051 | 1.000       |
| RH         | V1          | dorsal  | - LH       | V1          | ventral | 1.499      | 0.601 | 2.495   | 573  | 0.849       |
| RH         | V1          | dorsal  | - LH       | V2          | dorsal  | -8.300     | 0.584 | -14.223 | 519  | < .001      |
| RH         | V1          | dorsal  | - LH       | V2          | ventral | -2.278     | 0.636 | -3.579  | 324  | 0.026       |
| RH         | V1          | dorsal  | - LH       | V3          | dorsal  | -7.555     | 0.570 | -13.248 | 551  | < .001      |
| RH         | V1          | dorsal  | - LH       | V3          | ventral | -3.017     | 0.644 | -4.684  | 319  | < .001      |
| RH         | V1          | dorsal  | - RH       | V1          | ventral | 2.597      | 0.542 | 4.793   | 1179 | < .001      |
| RH         | V1          | dorsal  | - RH       | V2          | dorsal  | 0.295      | 0.524 | 0.564   | 1106 | 1.000       |
| RH         | V1          | dorsal  | - RH       | V2          | ventral | -1.187     | 0.576 | -2.062  | 537  | 1.000       |
| RH         | V1          | dorsal  | - RH       | V3          | dorsal  | -3.954     | 0.540 | -7.328  | 993  | < .001      |
| RH         | V1          | dorsal  | - RH       | V3          | ventral | -3.362     | 0.611 | -5.502  | 465  | < .001      |
| RH         | V1          | ventral | - LH       | V2          | ventral | -4.875     | 0.584 | -8.352  | 519  | < .001      |
| RH         | V1          | ventral | - LH       | V3          | ventral | -5.614     | 0.570 | -9.844  | 551  | < .001      |
| RH         | V1          | ventral | - RH       | V2          | ventral | -3.784     | 0.524 | -7.225  | 1106 | < .001      |
| RH         | V1          | ventral | - RH       | V3          | ventral | -5.959     | 0.540 | -11.045 | 993  | < .001      |
| RH         | V2          | dorsal  | - LH       | V1          | ventral | 1.204      | 0.599 | 2.011   | 353  | 1.000       |
| RH         | V2          | dorsal  | - LH       | V2          | ventral | -2.573     | 0.601 | -4.284  | 573  | 0.001       |
| RH         | V2          | dorsal  | - LH       | V3          | dorsal  | -7.850     | 0.539 | -14.559 | 646  | < .001      |

| Comparison |             |         |            |             |         | Difference | SE    | t      | df   | Pbonferroni |
|------------|-------------|---------|------------|-------------|---------|------------|-------|--------|------|-------------|
| Hemisphere | Visual area | Half    | Hemisphere | Visual area | Half    |            |       |        |      |             |
| RH         | V2          | dorsal  | - LH       | V3          | ventral | -3.313     | 0.603 | -5.496 | 349  | < .001      |
| RH         | V2          | dorsal  | - RH       | V1          | ventral | 2.301      | 0.545 | 4.221  | 625  | 0.002       |
| RH         | V2          | dorsal  | - RH       | V2          | ventral | -1.482     | 0.542 | -2.736 | 1179 | 0.417       |
| RH         | V2          | dorsal  | - RH       | V3          | dorsal  | -4.249     | 0.513 | -8.286 | 1189 | < .001      |
| RH         | V2          | dorsal  | - RH       | V3          | ventral | -3.658     | 0.573 | -6.384 | 544  | < .001      |
| RH         | V2          | ventral | - LH       | V3          | ventral | -1.830     | 0.539 | -3.394 | 646  | 0.048       |
| RH         | V2          | ventral | - RH       | V3          | ventral | -2.175     | 0.513 | -4.242 | 1189 | 0.002       |
| RH         | V3          | dorsal  | - LH       | V1          | ventral | 5.453      | 0.618 | 8.821  | 337  | < .001      |
| RH         | V3          | dorsal  | - LH       | V2          | ventral | 1.676      | 0.614 | 2.728  | 340  | 0.442       |
| RH         | V3          | dorsal  | - LH       | V3          | ventral | 0.936      | 0.601 | 1.559  | 573  | 1.000       |
| RH         | V3          | dorsal  | - RH       | V1          | ventral | 6.550      | 0.538 | 12.186 | 653  | < .001      |
| RH         | V3          | dorsal  | - RH       | V2          | ventral | 2.767      | 0.527 | 5.248  | 694  | < .001      |
| RH         | V3          | dorsal  | - RH       | V3          | ventral | 0.591      | 0.542 | 1.091  | 1179 | 1.000       |

## References

[1] The jamovi project (2022). *jamovi*. (Version 2.3) [Computer Software]. Retrieved from <https://www.jamovi.org>.

[2] R Core Team (2021). *R: A Language and environment for statistical computing*. (Version 4.1) [Computer software]. Retrieved from <https://cran.r-project.org>. (R packages retrieved from MRAN snapshot 2022-01-01).

[3] Gallucci, M. (2019). *GAMLj: General analyses for linear models*. [jamovi module]. Retrieved from <https://gamlj.github.io/>.
