# Supplementary material for: Variability of visual field maps in human early extrastriate cortex challenges the canonical model of organization of V2 and V3
Source: eLife journal article supplement (doi:10.7554/elife.86439), 2023-08-03
Supplement: supp2 [file elife-86439-supp2-v1.pdf]

# Results - Eccentricity

## Mixed Model

### Model Info

---

| Info                  |                                                                                                                                                                                                                         |
|-----------------------|-------------------------------------------------------------------------------------------------------------------------------------------------------------------------------------------------------------------------|
| Estimate              | Linear mixed model fit by REML                                                                                                                                                                                          |
| Call                  | Mean difference from the average map ~ 1 + Hemisphere + Visual area + Half + Hemisphere:Visual area + Hemisphere:Half + Visual area:Half + Hemisphere:Visual area:Half+( 1 + Hemisphere + Visual area + Half   HCP_ID ) |
| AIC                   | 833.430                                                                                                                                                                                                                 |
| BIC                   | 1062.619                                                                                                                                                                                                                |
| LogLikel.             | -423.742                                                                                                                                                                                                                |
| R-squared Marginal    | 0.105                                                                                                                                                                                                                   |
| R-squared Conditional | 0.671                                                                                                                                                                                                                   |
| Converged             | yes                                                                                                                                                                                                                     |
| Optimizer             | bobyqa                                                                                                                                                                                                                  |

---

Note. (Almost) singular fit. Maybe random coefficients variances are too small or correlations among them too large.

Note. boundary (singular) fit: see help('isSingular')

[3]

## Model Results

### Fixed Effect Omnibus tests

---

|                                 | F      | Num df | Den df | p     |
|---------------------------------|--------|--------|--------|-------|
| Hemisphere                      | 118.93 | 1      | 181    | <.001 |
| Visual area                     | 5.54   | 2      | 259    | 0.004 |
| Half                            | 21.55  | 1      | 180    | <.001 |
| Hemisphere * Visual area        | 16.88  | 2      | 1440   | <.001 |
| Hemisphere * Half               | 245.31 | 1      | 1440   | <.001 |
| Visual area * Half              | 21.86  | 2      | 1440   | <.001 |
| Hemisphere * Visual area * Half | 8.77   | 2      | 1440   | <.001 |

---

Note. Satterthwaite method for degrees of freedom

Fixed Effects Parameter Estimates

| Names                              | Effect                               | Estimate | SE     | 95% Confidence Interval |          | df   | t       | p      |
|------------------------------------|--------------------------------------|----------|--------|-------------------------|----------|------|---------|--------|
|                                    |                                      |          |        | Lower                   | Upper    |      |         |        |
| (Intercept)                        | (Intercept)                          | 0.8097   | 0.0193 | 0.7718                  | 0.84762  | 180  | 41.860  | < .001 |
| Hemisphere1                        | RH - LH                              | -0.1367  | 0.0125 | -0.1612                 | -0.11210 | 181  | -10.906 | < .001 |
| Visual area1                       | V2 - V1                              | 0.0133   | 0.0135 | -0.0132                 | 0.03979  | 402  | 0.984   | 0.326  |
| Visual area2                       | V3 - V1                              | 0.0484   | 0.0149 | 0.0191                  | 0.07763  | 182  | 3.237   | 0.001  |
| Half1                              | ventral - dorsal                     | -0.1275  | 0.0275 | -0.1814                 | -0.07369 | 180  | -4.642  | < .001 |
| Hemisphere1 * Visual area1         | RH - LH * V2 - V1                    | -0.0136  | 0.0250 | -0.0626                 | 0.03551  | 1440 | -0.542  | 0.588  |
| Hemisphere1 * Visual area2         | RH - LH * V3 - V1                    | 0.1186   | 0.0250 | 0.0696                  | 0.16772  | 1440 | 4.739   | < .001 |
| Hemisphere1 * Half1                | RH - LH * ventral - dorsal           | 0.3202   | 0.0204 | 0.2801                  | 0.36026  | 1440 | 15.662  | < .001 |
| Visual area1 * Half1               | V2 - V1 * ventral - dorsal           | 0.0798   | 0.0250 | 0.0307                  | 0.12882  | 1440 | 3.185   | 0.001  |
| Visual area2 * Half1               | V3 - V1 * ventral - dorsal           | 0.1655   | 0.0250 | 0.1164                  | 0.21460  | 1440 | 6.611   | < .001 |
| Hemisphere1 * Visual area1 * Half1 | RH - LH * V2 - V1 * ventral - dorsal | 0.1161   | 0.0501 | 0.0179                  | 0.21423  | 1440 | 2.318   | 0.021  |
| Hemisphere1 * Visual area2 * Half1 | RH - LH * V3 - V1 * ventral - dorsal | -0.0933  | 0.0501 | -0.1914                 | 0.00487  | 1440 | -1.863  | 0.063  |

Random Components

| Groups   | Name         | SD     | Variance | ICC   |
|----------|--------------|--------|----------|-------|
| HCP_ID   | (Intercept)  | 0.2510 | 0.06299  | 0.526 |
|          | Hemisphere1  | 0.0975 | 0.00951  |       |
|          | Visual area1 | 0.0685 | 0.00470  |       |
|          | Visual area2 | 0.1096 | 0.01202  |       |
|          | Half1        | 0.3431 | 0.11771  |       |
| Residual |              | 0.2382 | 0.05673  |       |

Note. Number of Obs: 2172 , groups: HCP\_ID 181

Random Parameters correlations

| Groups | Param.1      | Param.2      | Corr.    |
|--------|--------------|--------------|----------|
| HCP_ID | (Intercept)  | Hemisphere1  | -0.33880 |
|        | (Intercept)  | Visual area1 | 0.76019  |
|        | (Intercept)  | Visual area2 | 0.12968  |
|        | (Intercept)  | Half1        | -0.76439 |
|        | Hemisphere1  | Visual area1 | -0.20279 |
|        | Hemisphere1  | Visual area2 | 0.17127  |
|        | Hemisphere1  | Half1        | 0.19810  |
|        | Visual area1 | Visual area2 | 0.59015  |
|        | Visual area1 | Half1        | -0.78789 |
|        | Visual area2 | Half1        | 0.00116  |

Post Hoc Tests

Post Hoc Comparisons - Hemisphere

| Comparison |            |            |        |      |     |             |
|------------|------------|------------|--------|------|-----|-------------|
| Hemisphere | Hemisphere | Difference | SE     | t    | df  | Pbonferroni |
| LH         | - RH       | 0.137      | 0.0125 | 10.9 | 180 | <.001       |

Post Hoc Comparisons - Visual area

| Comparison  |             |            |        |        |     |             |
|-------------|-------------|------------|--------|--------|-----|-------------|
| Visual area | Visual area | Difference | SE     | t      | df  | Pbonferroni |
| V1          | - V2        | -0.0133    | 0.0135 | -0.984 | 180 | 0.980       |
| V1          | - V3        | -0.0484    | 0.0149 | -3.237 | 180 | 0.004       |
| V2          | - V3        | -0.0351    | 0.0141 | -2.478 | 180 | 0.042       |

Post Hoc Comparisons - Half

| Comparison |           |            |        |      |     |             |
|------------|-----------|------------|--------|------|-----|-------------|
| Half       | Half      | Difference | SE     | t    | df  | Pbonferroni |
| dorsal     | - ventral | 0.128      | 0.0275 | 4.64 | 180 | <.001       |

Post Hoc Comparisons - Hemisphere \* Visual area

| Comparison |             |            |             |            |        |        |     |             |
|------------|-------------|------------|-------------|------------|--------|--------|-----|-------------|
| Hemisphere | Visual area | Hemisphere | Visual area | Difference | SE     | t      | df  | Pbonferroni |
| LH         | V1          | - LH       | V2          | -0.02008   | 0.0184 | -1.090 | 562 | 1.000       |
| LH         | V1          | - LH       | V3          | 0.01097    | 0.0195 | 0.563  | 487 | 1.000       |
| LH         | V1          | - RH       | V1          | 0.17169    | 0.0191 | 8.974  | 780 | <.001       |
| LH         | V1          | - RH       | V2          | 0.16518    | 0.0194 | 8.507  | 242 | <.001       |
| LH         | V1          | - RH       | V3          | 0.06402    | 0.0213 | 3.009  | 229 | 0.044       |
| LH         | V2          | - LH       | V3          | 0.03105    | 0.0189 | 1.644  | 526 | 1.000       |
| LH         | V2          | - RH       | V2          | 0.18525    | 0.0191 | 9.683  | 780 | <.001       |
| LH         | V2          | - RH       | V3          | 0.08410    | 0.0211 | 3.988  | 231 | 0.001       |
| LH         | V3          | - RH       | V3          | 0.05305    | 0.0191 | 2.773  | 780 | 0.085       |
| RH         | V1          | - LH       | V2          | -0.19177   | 0.0202 | -9.506 | 236 | <.001       |
| RH         | V1          | - LH       | V3          | -0.16072   | 0.0203 | -7.916 | 235 | <.001       |
| RH         | V1          | - RH       | V2          | -0.00652   | 0.0184 | -0.354 | 562 | 1.000       |
| RH         | V1          | - RH       | V3          | -0.10767   | 0.0195 | -5.525 | 487 | <.001       |
| RH         | V2          | - LH       | V3          | -0.15421   | 0.0193 | -7.972 | 242 | <.001       |
| RH         | V2          | - RH       | V3          | -0.10116   | 0.0189 | -5.355 | 526 | <.001       |

Post Hoc Comparisons - Hemisphere \* Half

| Comparison |         |            |         | Difference | SE     | t      | df  | Pbonferroni |
|------------|---------|------------|---------|------------|--------|--------|-----|-------------|
| Hemisphere | Half    | Hemisphere | Half    |            |        |        |     |             |
| LH         | dorsal  | - LH       | ventral | 0.28763    | 0.0293 | 9.812  | 233 | < .001      |
| LH         | dorsal  | - RH       | dorsal  | 0.29676    | 0.0162 | 18.351 | 470 | < .001      |
| LH         | dorsal  | - RH       | ventral | 0.26420    | 0.0314 | 8.418  | 180 | < .001      |
| LH         | ventral | - RH       | ventral | -0.02343   | 0.0162 | -1.449 | 470 | 0.888       |
| RH         | dorsal  | - LH       | ventral | -0.00913   | 0.0290 | -0.315 | 180 | 1.000       |
| RH         | dorsal  | - RH       | ventral | -0.03256   | 0.0293 | -1.111 | 233 | 1.000       |

Post Hoc Comparisons - Visual area \* Half

| Comparison  |         |             |         | Difference | SE     | t      | df  | Pbonferroni |
|-------------|---------|-------------|---------|------------|--------|--------|-----|-------------|
| Visual area | Half    | Visual area | Half    |            |        |        |     |             |
| V1          | dorsal  | - V1        | ventral | 0.20930    | 0.0310 | 6.742  | 290 | < .001      |
| V1          | dorsal  | - V2        | dorsal  | 0.02658    | 0.0184 | 1.443  | 562 | 1.000       |
| V1          | dorsal  | - V2        | ventral | 0.15612    | 0.0280 | 5.572  | 206 | < .001      |
| V1          | dorsal  | - V3        | dorsal  | 0.03441    | 0.0195 | 1.765  | 487 | 1.000       |
| V1          | dorsal  | - V3        | ventral | 0.07818    | 0.0321 | 2.435  | 200 | 0.236       |
| V1          | ventral | - V2        | ventral | -0.05317   | 0.0184 | -2.886 | 562 | 0.061       |
| V1          | ventral | - V3        | ventral | -0.13111   | 0.0195 | -6.727 | 487 | < .001      |
| V2          | dorsal  | - V1        | ventral | 0.18272    | 0.0346 | 5.287  | 197 | < .001      |
| V2          | dorsal  | - V2        | ventral | 0.12955    | 0.0310 | 4.173  | 290 | < .001      |
| V2          | dorsal  | - V3        | dorsal  | 0.00783    | 0.0189 | 0.415  | 526 | 1.000       |
| V2          | dorsal  | - V3        | ventral | 0.05160    | 0.0348 | 1.482  | 197 | 1.000       |
| V2          | ventral | - V3        | ventral | -0.07794   | 0.0189 | -4.126 | 526 | < .001      |
| V3          | dorsal  | - V1        | ventral | 0.17489    | 0.0321 | 5.450  | 200 | < .001      |
| V3          | dorsal  | - V2        | ventral | 0.12171    | 0.0283 | 4.298  | 206 | < .001      |
| V3          | dorsal  | - V3        | ventral | 0.04377    | 0.0310 | 1.410  | 290 | 1.000       |

Post Hoc Comparisons - Hemisphere \* Visual area \* Half

| Comparison |             |         |            |             |         | Difference | SE     | t       | df   | Pbonferroni |
|------------|-------------|---------|------------|-------------|---------|------------|--------|---------|------|-------------|
| Hemisphere | Visual area | Half    | Hemisphere | Visual area | Half    |            |        |         |      |             |
| LH         | V1          | dorsal  | - LH       | V1          | ventral | 0.36559    | 0.0357 | 10.230  | 482  | < .001      |
| LH         | V1          | dorsal  | - LH       | V2          | dorsal  | -0.00922   | 0.0256 | -0.361  | 1181 | 1.000       |
| LH         | V1          | dorsal  | - LH       | V2          | ventral | 0.33466    | 0.0331 | 10.097  | 391  | < .001      |
| LH         | V1          | dorsal  | - LH       | V3          | dorsal  | 0.11705    | 0.0263 | 4.445   | 1063 | < .001      |
| LH         | V1          | dorsal  | - LH       | V3          | ventral | 0.27048    | 0.0367 | 7.378   | 333  | < .001      |
| LH         | V1          | dorsal  | - RH       | V1          | dorsal  | 0.32799    | 0.0261 | 12.583  | 1306 | < .001      |
| LH         | V1          | dorsal  | - RH       | V1          | ventral | 0.38099    | 0.0375 | 10.171  | 356  | < .001      |
| LH         | V1          | dorsal  | - RH       | V2          | dorsal  | 0.39037    | 0.0263 | 14.856  | 689  | < .001      |
| LH         | V1          | dorsal  | - RH       | V2          | ventral | 0.30558    | 0.0348 | 8.787   | 290  | < .001      |
| LH         | V1          | dorsal  | - RH       | V3          | dorsal  | 0.27975    | 0.0277 | 10.107  | 589  | < .001      |
| LH         | V1          | dorsal  | - RH       | V3          | ventral | 0.21387    | 0.0386 | 5.540   | 263  | < .001      |
| LH         | V1          | ventral | - LH       | V2          | ventral | -0.03093   | 0.0256 | -1.211  | 1181 | 1.000       |
| LH         | V1          | ventral | - LH       | V3          | ventral | -0.09511   | 0.0263 | -3.612  | 1063 | 0.021       |
| LH         | V1          | ventral | - RH       | V1          | ventral | 0.01540    | 0.0261 | 0.591   | 1306 | 1.000       |
| LH         | V1          | ventral | - RH       | V2          | ventral | -0.06001   | 0.0263 | -2.284  | 689  | 1.000       |
| LH         | V1          | ventral | - RH       | V3          | ventral | -0.15172   | 0.0277 | -5.481  | 589  | < .001      |
| LH         | V2          | dorsal  | - LH       | V1          | ventral | 0.37481    | 0.0388 | 9.652   | 309  | < .001      |
| LH         | V2          | dorsal  | - LH       | V2          | ventral | 0.34388    | 0.0357 | 9.622   | 482  | < .001      |
| LH         | V2          | dorsal  | - LH       | V3          | dorsal  | 0.12627    | 0.0259 | 4.877   | 1129 | < .001      |
| LH         | V2          | dorsal  | - LH       | V3          | ventral | 0.27970    | 0.0391 | 7.161   | 307  | < .001      |
| LH         | V2          | dorsal  | - RH       | V1          | ventral | 0.39021    | 0.0406 | 9.610   | 253  | < .001      |
| LH         | V2          | dorsal  | - RH       | V2          | dorsal  | 0.39959    | 0.0261 | 15.330  | 1306 | < .001      |
| LH         | V2          | dorsal  | - RH       | V2          | ventral | 0.31480    | 0.0375 | 8.404   | 356  | < .001      |
| LH         | V2          | dorsal  | - RH       | V3          | dorsal  | 0.28898    | 0.0275 | 10.496  | 598  | < .001      |
| LH         | V2          | dorsal  | - RH       | V3          | ventral | 0.22310    | 0.0411 | 5.432   | 251  | < .001      |
| LH         | V2          | ventral | - LH       | V3          | ventral | -0.06418   | 0.0259 | -2.479  | 1129 | 0.879       |
| LH         | V2          | ventral | - RH       | V2          | ventral | -0.02908   | 0.0261 | -1.116  | 1306 | 1.000       |
| LH         | V2          | ventral | - RH       | V3          | ventral | -0.12079   | 0.0275 | -4.387  | 598  | < .001      |
| LH         | V3          | dorsal  | - LH       | V1          | ventral | 0.24854    | 0.0366 | 6.782   | 333  | < .001      |
| LH         | V3          | dorsal  | - LH       | V2          | ventral | 0.21761    | 0.0334 | 6.516   | 385  | < .001      |
| LH         | V3          | dorsal  | - LH       | V3          | ventral | 0.15343    | 0.0357 | 4.293   | 482  | 0.001       |
| LH         | V3          | dorsal  | - RH       | V1          | ventral | 0.26394    | 0.0381 | 6.934   | 266  | < .001      |
| LH         | V3          | dorsal  | - RH       | V2          | ventral | 0.18853    | 0.0347 | 5.429   | 290  | < .001      |
| LH         | V3          | dorsal  | - RH       | V3          | dorsal  | 0.16270    | 0.0261 | 6.242   | 1306 | < .001      |
| LH         | V3          | dorsal  | - RH       | V3          | ventral | 0.09682    | 0.0375 | 2.585   | 356  | 0.669       |
| LH         | V3          | ventral | - RH       | V3          | ventral | -0.05661   | 0.0261 | -2.172  | 1306 | 1.000       |
| RH         | V1          | dorsal  | - LH       | V1          | ventral | 0.03760    | 0.0354 | 1.061   | 390  | 1.000       |
| RH         | V1          | dorsal  | - LH       | V2          | dorsal  | -0.33721   | 0.0268 | -12.564 | 645  | < .001      |
| RH         | V1          | dorsal  | - LH       | V2          | ventral | 0.00667    | 0.0331 | 0.202   | 307  | 1.000       |
| RH         | V1          | dorsal  | - LH       | V3          | dorsal  | -0.21093   | 0.0269 | -7.831  | 638  | < .001      |
| RH         | V1          | dorsal  | - LH       | V3          | ventral | -0.05751   | 0.0361 | -1.593  | 279  | 1.000       |
| RH         | V1          | dorsal  | - RH       | V1          | ventral | 0.05300    | 0.0357 | 1.483   | 482  | 1.000       |
| RH         | V1          | dorsal  | - RH       | V2          | dorsal  | 0.06238    | 0.0256 | 2.441   | 1181 | 0.975       |
| RH         | V1          | dorsal  | - RH       | V2          | ventral | -0.02241   | 0.0331 | -0.676  | 391  | 1.000       |
| RH         | V1          | dorsal  | - RH       | V3          | dorsal  | -0.04823   | 0.0263 | -1.832  | 1063 | 1.000       |
| RH         | V1          | dorsal  | - RH       | V3          | ventral | -0.11411   | 0.0367 | -3.113  | 333  | 0.133       |
| RH         | V1          | ventral | - LH       | V2          | ventral | -0.04633   | 0.0268 | -1.726  | 645  | 1.000       |
| RH         | V1          | ventral | - LH       | V3          | ventral | -0.11051   | 0.0269 | -4.102  | 638  | 0.003       |
| RH         | V1          | ventral | - RH       | V2          | ventral | -0.07541   | 0.0256 | -2.951  | 1181 | 0.213       |
| RH         | V1          | ventral | - RH       | V3          | ventral | -0.16712   | 0.0263 | -6.347  | 1063 | < .001      |
| RH         | V2          | dorsal  | - LH       | V1          | ventral | -0.02478   | 0.0384 | -0.646  | 264  | 1.000       |
| RH         | V2          | dorsal  | - LH       | V2          | ventral | -0.05571   | 0.0354 | -1.572  | 390  | 1.000       |
| RH         | V2          | dorsal  | - LH       | V3          | dorsal  | -0.27331   | 0.0262 | -10.423 | 693  | < .001      |

| Comparison |             |         |            |             |         | Difference | SE     | t      | df   | Pbonferroni |
|------------|-------------|---------|------------|-------------|---------|------------|--------|--------|------|-------------|
| Hemisphere | Visual area | Half    | Hemisphere | Visual area | Half    |            |        |        |      |             |
| RH         | V2          | dorsal  | - LH       | V3          | ventral | -0.11989   | 0.0383 | -3.127 | 264  | 0.130       |
| RH         | V2          | dorsal  | - RH       | V1          | ventral | -0.00938   | 0.0388 | -0.241 | 309  | 1.000       |
| RH         | V2          | dorsal  | - RH       | V2          | ventral | -0.08479   | 0.0357 | -2.372 | 482  | 1.000       |
| RH         | V2          | dorsal  | - RH       | V3          | dorsal  | -0.11061   | 0.0259 | -4.272 | 1129 | 0.001       |
| RH         | V2          | dorsal  | - RH       | V3          | ventral | -0.17649   | 0.0391 | -4.518 | 307  | < .001      |
| RH         | V2          | ventral | - LH       | V3          | ventral | -0.03510   | 0.0262 | -1.338 | 693  | 1.000       |
| RH         | V2          | ventral | - RH       | V3          | ventral | -0.09170   | 0.0259 | -3.542 | 1129 | 0.027       |
| RH         | V3          | dorsal  | - LH       | V1          | ventral | 0.08584    | 0.0366 | 2.342  | 275  | 1.000       |
| RH         | V3          | dorsal  | - LH       | V2          | ventral | 0.05490    | 0.0336 | 1.633  | 301  | 1.000       |
| RH         | V3          | dorsal  | - LH       | V3          | ventral | -0.00927   | 0.0354 | -0.262 | 390  | 1.000       |
| RH         | V3          | dorsal  | - RH       | V1          | ventral | 0.10123    | 0.0366 | 2.762  | 333  | 0.400       |
| RH         | V3          | dorsal  | - RH       | V2          | ventral | 0.02582    | 0.0334 | 0.773  | 385  | 1.000       |
| RH         | V3          | dorsal  | - RH       | V3          | ventral | -0.06588   | 0.0357 | -1.843 | 482  | 1.000       |

## References

- [1] The jamovi project (2022). *jamovi*. (Version 2.3) [Computer Software]. Retrieved from <https://www.jamovi.org>.
- [2] R Core Team (2021). *R: A Language and environment for statistical computing*. (Version 4.1) [Computer software]. Retrieved from <https://cran.r-project.org>. (R packages retrieved from MRAN snapshot 2022-01-01).
- [3] Gallucci, M. (2019). *GAMLj: General analyses for linear models*. [jamovi module]. Retrieved from <https://gamlj.github.io/>.
