# Supplementary material for: Variability of visual field maps in human early extrastriate cortex challenges the canonical model of organization of V2 and V3
Source: eLife journal article supplement (doi:10.7554/elife.86439), 2023-08-03
Supplement: supp3 [file elife-86439-supp3-v1.pdf]

# Results - Polar angle

## Mixed Model

### Model Info

---

| Info                  |                                                                                                                                                                                                                                                                                                                                      |
|-----------------------|--------------------------------------------------------------------------------------------------------------------------------------------------------------------------------------------------------------------------------------------------------------------------------------------------------------------------------------|
| Estimate              | Linear mixed model fit by REML                                                                                                                                                                                                                                                                                                       |
| Call                  | Mean difference from the average map ~ 1 + Hemisphere + Visual area + Half + Mean difference in curvature + Mean difference in normalized mean BOLD + Mean intra-individual variability + Hemisphere:Visual area + Hemisphere:Half + Visual area:Half + Hemisphere:Visual area:Half+( Hemisphere + Visual area + Half + 1   HCP_ID ) |
| AIC                   | 13480.166                                                                                                                                                                                                                                                                                                                            |
| BIC                   | 13661.947                                                                                                                                                                                                                                                                                                                            |
| LogLikel.             | -6711.881                                                                                                                                                                                                                                                                                                                            |
| R-squared Marginal    | 0.342                                                                                                                                                                                                                                                                                                                                |
| R-squared Conditional | 0.626                                                                                                                                                                                                                                                                                                                                |
| Converged             | yes                                                                                                                                                                                                                                                                                                                                  |
| Optimizer             | bobyqa                                                                                                                                                                                                                                                                                                                               |

---

Note. (Almost) singular fit. Maybe random coefficients variances are too small or correlations among them too large.

Note. boundary (singular) fit: see help("isSingular")

[3]

## Model Results

### Fixed Effect Omnibus tests

---

|                                         | F      | Num df | Den df | p      |
|-----------------------------------------|--------|--------|--------|--------|
| Hemisphere                              | 75.80  | 1      | 189    | < .001 |
| Visual area                             | 66.33  | 2      | 384    | < .001 |
| Half                                    | 51.82  | 1      | 207    | < .001 |
| Mean difference in curvature            | 7.97   | 1      | 1812   | 0.005  |
| Mean difference in normalized mean BOLD | 1.23   | 1      | 597    | 0.268  |
| Mean intra-individual variability       | 317.35 | 1      | 1364   | < .001 |
| Hemisphere * Visual area                | 6.47   | 2      | 1461   | 0.002  |
| Hemisphere * Half                       | 87.07  | 1      | 1518   | < .001 |
| Visual area * Half                      | 10.47  | 2      | 1451   | < .001 |
| Hemisphere * Visual area * Half         | 1.12   | 2      | 1454   | 0.327  |

---

Note. Satterthwaite method for degrees of freedom

Fixed Effects Parameter Estimates

| Names                                   | Effect                                  | Estimate | SE    | 95% Confidence Interval |        | df   | t      | p      |
|-----------------------------------------|-----------------------------------------|----------|-------|-------------------------|--------|------|--------|--------|
|                                         |                                         |          |       | Lower                   | Upper  |      |        |        |
| (Intercept)                             | (Intercept)                             | 18.584   | 0.267 | 18.0604                 | 19.107 | 179  | 69.581 | < .001 |
| Hemisphere1                             | RH - LH                                 | -2.437   | 0.280 | -2.9855                 | -1.888 | 189  | -8.707 | < .001 |
| Visual area1                            | V2 - V1                                 | 1.929    | 0.327 | 1.2881                  | 2.571  | 323  | 5.897  | < .001 |
| Visual area2                            | V3 - V1                                 | 3.538    | 0.315 | 2.9200                  | 4.157  | 288  | 11.217 | < .001 |
| Half1                                   | ventral - dorsal                        | -2.115   | 0.294 | -2.6903                 | -1.539 | 207  | -7.199 | < .001 |
| Mean difference in curvature            | Mean difference in curvature            | 0.402    | 0.142 | 0.1229                  | 0.681  | 1812 | 2.823  | 0.005  |
| Mean difference in normalized mean BOLD | Mean difference in normalized mean BOLD | 0.206    | 0.186 | -0.1588                 | 0.572  | 597  | 1.108  | 0.268  |
| Mean intra-individual variability       | Mean intra-individual variability       | 2.902    | 0.163 | 2.5829                  | 3.222  | 1364 | 17.814 | < .001 |
| Hemisphere1 * Visual area1              | RH - LH * V2 - V1                       | -0.838   | 0.479 | -1.7756                 | 0.100  | 1442 | -1.750 | 0.080  |
| Hemisphere1 * Visual area2              | RH - LH * V3 - V1                       | 0.913    | 0.483 | -0.0328                 | 1.860  | 1462 | 1.892  | 0.059  |
| Hemisphere1 * Half1                     | RH - LH * ventral - dorsal              | 3.750    | 0.402 | 2.9624                  | 4.538  | 1518 | 9.331  | < .001 |
| Visual area1 * Half1                    | V2 - V1 * ventral - dorsal              | 1.968    | 0.481 | 1.0258                  | 2.910  | 1455 | 4.094  | < .001 |
| Visual area2 * Half1                    | V3 - V1 * ventral - dorsal              | 1.843    | 0.481 | 0.9005                  | 2.786  | 1456 | 3.832  | < .001 |
| Hemisphere1 * Visual area1 * Half1      | RH - LH * V2 - V1 * ventral - dorsal    | 1.364    | 0.958 | -0.5142                 | 3.242  | 1446 | 1.423  | 0.155  |
| Hemisphere1 * Visual area2 * Half1      | RH - LH * V3 - V1 * ventral - dorsal    | 0.291    | 0.959 | -1.5896                 | 2.171  | 1448 | 0.303  | 0.762  |

Random Components

| Groups   | Name         | SD   | Variance | ICC   |
|----------|--------------|------|----------|-------|
| HCP_ID   | (Intercept)  | 3.35 | 11.19    | 0.351 |
|          | Hemisphere1  | 2.61 | 6.83     |       |
|          | Visual area1 | 1.93 | 3.71     |       |
|          | Visual area2 | 1.89 | 3.59     |       |
|          | Half1        | 2.72 | 7.40     |       |
| Residual |              | 4.55 | 20.67    |       |

Note. Number of Obs: 2172 , groups: HCP\_ID 181

Random Parameters correlations

| Groups | Param.1      | Param.2      | Corr.   |
|--------|--------------|--------------|---------|
| HCP_ID | (Intercept)  | Hemisphere1  | 0.0951  |
|        | (Intercept)  | Visual area1 | -0.1737 |
|        | (Intercept)  | Visual area2 | 0.0738  |
|        | (Intercept)  | Half1        | -0.1242 |
|        | Hemisphere1  | Visual area1 | -0.1392 |
|        | Hemisphere1  | Visual area2 | 0.2809  |
|        | Hemisphere1  | Half1        | 0.0240  |
|        | Visual area1 | Visual area2 | 0.8619  |
|        | Visual area1 | Half1        | -0.2336 |
|        | Visual area2 | Half1        | -0.0152 |

## Post Hoc Tests

### Post Hoc Comparisons - Hemisphere

| Comparison |            |            |       |      |     |                         |  |
|------------|------------|------------|-------|------|-----|-------------------------|--|
| Hemisphere | Hemisphere | Difference | SE    | t    | df  | P <sub>bonferroni</sub> |  |
| LH         | - RH       | 2.44       | 0.280 | 8.70 | 190 | < .001                  |  |

### Post Hoc Comparisons - Visual area

| Comparison  |             |            |       |        |     |                         |  |
|-------------|-------------|------------|-------|--------|-----|-------------------------|--|
| Visual area | Visual area | Difference | SE    | t      | df  | P <sub>bonferroni</sub> |  |
| V1          | - V2        | -1.93      | 0.328 | -5.88  | 304 | < .001                  |  |
| V1          | - V3        | -3.54      | 0.316 | -11.18 | 273 | < .001                  |  |
| V2          | - V3        | -1.61      | 0.252 | -6.39  | 183 | < .001                  |  |

### Post Hoc Comparisons - Half

| Comparison |           |            |       |      |     |                         |  |
|------------|-----------|------------|-------|------|-----|-------------------------|--|
| Half       | Half      | Difference | SE    | t    | df  | P <sub>bonferroni</sub> |  |
| dorsal     | - ventral | 2.11       | 0.294 | 7.19 | 211 | < .001                  |  |

### Post Hoc Comparisons - Hemisphere \* Visual area

| Comparison |             |            |             |            |       |        |     |                         |  |
|------------|-------------|------------|-------------|------------|-------|--------|-----|-------------------------|--|
| Hemisphere | Visual area | Hemisphere | Visual area | Difference | SE    | t      | df  | P <sub>bonferroni</sub> |  |
| LH         | V1          | - LH       | V2          | -2.348     | 0.409 | -5.74  | 654 | < .001                  |  |
| LH         | V1          | - LH       | V3          | -3.082     | 0.390 | -7.91  | 589 | < .001                  |  |
| LH         | V1          | - RH       | V1          | 2.462      | 0.395 | 6.23   | 653 | < .001                  |  |
| LH         | V1          | - RH       | V2          | 0.952      | 0.437 | 2.18   | 293 | 0.454                   |  |
| LH         | V1          | - RH       | V3          | -1.533     | 0.460 | -3.33  | 272 | 0.015                   |  |
| LH         | V2          | - LH       | V3          | -0.733     | 0.352 | -2.08  | 617 | 0.564                   |  |
| LH         | V2          | - RH       | V2          | 3.300      | 0.400 | 8.25   | 676 | < .001                  |  |
| LH         | V2          | - RH       | V3          | 0.815      | 0.428 | 1.90   | 230 | 0.872                   |  |
| LH         | V3          | - RH       | V3          | 1.549      | 0.391 | 3.97   | 633 | 0.001                   |  |
| RH         | V1          | - LH       | V2          | -4.810     | 0.475 | -10.12 | 328 | < .001                  |  |
| RH         | V1          | - LH       | V3          | -5.544     | 0.425 | -13.04 | 294 | < .001                  |  |
| RH         | V1          | - RH       | V2          | -1.511     | 0.404 | -3.74  | 634 | 0.003                   |  |
| RH         | V1          | - RH       | V3          | -3.995     | 0.406 | -9.84  | 645 | < .001                  |  |
| RH         | V2          | - LH       | V3          | -4.033     | 0.370 | -10.89 | 252 | < .001                  |  |
| RH         | V2          | - RH       | V3          | -2.484     | 0.349 | -7.13  | 600 | < .001                  |  |

Post Hoc Comparisons - Hemisphere \* Half

| Comparison |         |            |         | Difference | SE    | t      | df  | Pbonferroni |
|------------|---------|------------|---------|------------|-------|--------|-----|-------------|
| Hemisphere | Half    | Hemisphere | Half    |            |       |        |     |             |
| LH         | dorsal  | - LH       | ventral | 3.990      | 0.364 | 10.950 | 461 | < .001      |
| LH         | dorsal  | - RH       | dorsal  | 4.312      | 0.352 | 12.259 | 445 | < .001      |
| LH         | dorsal  | - RH       | ventral | 4.551      | 0.417 | 10.910 | 215 | < .001      |
| LH         | ventral | - RH       | ventral | 0.562      | 0.338 | 1.664  | 391 | 0.582       |
| RH         | dorsal  | - LH       | ventral | -0.322     | 0.395 | -0.817 | 186 | 1.000       |
| RH         | dorsal  | - RH       | ventral | 0.240      | 0.348 | 0.688  | 404 | 1.000       |

Post Hoc Comparisons - Visual area \* Half

| Comparison  |         |             |         | Difference | SE    | t       | df  | Pbonferroni |
|-------------|---------|-------------|---------|------------|-------|---------|-----|-------------|
| Visual area | Half    | Visual area | Half    |            |       |         |     |             |
| V1          | dorsal  | - V1        | ventral | 3.385      | 0.410 | 8.253   | 682 | < .001      |
| V1          | dorsal  | - V2        | dorsal  | -0.946     | 0.405 | -2.336  | 640 | 0.297       |
| V1          | dorsal  | - V2        | ventral | 0.472      | 0.420 | 1.124   | 262 | 1.000       |
| V1          | dorsal  | - V3        | dorsal  | -2.617     | 0.391 | -6.696  | 591 | < .001      |
| V1          | dorsal  | - V3        | ventral | -1.075     | 0.432 | -2.488  | 252 | 0.202       |
| V1          | ventral | - V2        | ventral | -2.913     | 0.409 | -7.120  | 655 | < .001      |
| V1          | ventral | - V3        | ventral | -4.460     | 0.404 | -11.040 | 639 | < .001      |
| V2          | dorsal  | - V1        | ventral | 4.330      | 0.504 | 8.599   | 363 | < .001      |
| V2          | dorsal  | - V2        | ventral | 1.417      | 0.402 | 3.528   | 648 | 0.007       |
| V2          | dorsal  | - V3        | dorsal  | -1.671     | 0.348 | -4.804  | 596 | < .001      |
| V2          | dorsal  | - V3        | ventral | -0.129     | 0.427 | -0.303  | 248 | 1.000       |
| V2          | ventral | - V3        | ventral | -1.546     | 0.347 | -4.460  | 591 | < .001      |
| V3          | dorsal  | - V1        | ventral | 6.002      | 0.476 | 12.610  | 342 | < .001      |
| V3          | dorsal  | - V2        | ventral | 3.088      | 0.389 | 7.934   | 246 | < .001      |
| V3          | dorsal  | - V3        | ventral | 1.542      | 0.401 | 3.850   | 641 | 0.002       |

Post Hoc Comparisons - Hemisphere \* Visual area \* Half

| Comparison |             |         |            |             |         | Difference | SE    | t        | df   | Pbonferroni |
|------------|-------------|---------|------------|-------------|---------|------------|-------|----------|------|-------------|
| Hemisphere | Visual area | Half    | Hemisphere | Visual area | Half    |            |       |          |      |             |
| LH         | V1          | dorsal  | - LH       | V1          | ventral | 4.98410    | 0.543 | 9.1731   | 1236 | < .001      |
| LH         | V1          | dorsal  | - LH       | V2          | dorsal  | -1.70535   | 0.528 | -3.2314  | 1176 | 0.084       |
| LH         | V1          | dorsal  | - LH       | V2          | ventral | 1.99298    | 0.547 | 3.6452   | 656  | 0.019       |
| LH         | V1          | dorsal  | - LH       | V3          | dorsal  | -2.23280   | 0.512 | -4.3641  | 1140 | < .001      |
| LH         | V1          | dorsal  | - LH       | V3          | ventral | 1.05371    | 0.555 | 1.8986   | 608  | 1.000       |
| LH         | V1          | dorsal  | - RH       | V1          | dorsal  | 4.06140    | 0.528 | 7.6920   | 1219 | < .001      |
| LH         | V1          | dorsal  | - RH       | V1          | ventral | 5.84705    | 0.583 | 10.0378  | 695  | < .001      |
| LH         | V1          | dorsal  | - RH       | V2          | dorsal  | 3.87564    | 0.567 | 6.8364   | 715  | < .001      |
| LH         | V1          | dorsal  | - RH       | V2          | ventral | 3.01149    | 0.571 | 5.2716   | 397  | < .001      |
| LH         | V1          | dorsal  | - RH       | V3          | dorsal  | 1.06064    | 0.571 | 1.8588   | 589  | 1.000       |
| LH         | V1          | dorsal  | - RH       | V3          | ventral | 0.85779    | 0.602 | 1.4246   | 364  | 1.000       |
| LH         | V1          | ventral | - LH       | V2          | ventral | -2.99112   | 0.534 | -5.6034  | 1193 | < .001      |
| LH         | V1          | ventral | - LH       | V3          | ventral | -3.93039   | 0.525 | -7.4926  | 1175 | < .001      |
| LH         | V1          | ventral | - RH       | V1          | ventral | 0.86295    | 0.516 | 1.6709   | 1165 | 1.000       |
| LH         | V1          | ventral | - RH       | V2          | ventral | -1.97261   | 0.553 | -3.5646  | 660  | 0.026       |
| LH         | V1          | ventral | - RH       | V3          | ventral | -4.12631   | 0.576 | -7.1695  | 601  | < .001      |
| LH         | V2          | dorsal  | - LH       | V1          | ventral | 6.68945    | 0.626 | 10.6892  | 745  | < .001      |
| LH         | V2          | dorsal  | - LH       | V2          | ventral | 3.69833    | 0.538 | 6.8753   | 1214 | < .001      |
| LH         | V2          | dorsal  | - LH       | V3          | dorsal  | -0.52745   | 0.493 | -1.0707  | 1253 | 1.000       |
| LH         | V2          | dorsal  | - LH       | V3          | ventral | 2.75906    | 0.562 | 4.9082   | 644  | < .001      |
| LH         | V2          | dorsal  | - RH       | V1          | ventral | 7.55240    | 0.668 | 11.3011  | 487  | < .001      |
| LH         | V2          | dorsal  | - RH       | V2          | dorsal  | 5.58099    | 0.543 | 10.2739  | 1284 | < .001      |
| LH         | V2          | dorsal  | - RH       | V2          | ventral | 4.71685    | 0.578 | 8.1591   | 683  | < .001      |
| LH         | V2          | dorsal  | - RH       | V3          | dorsal  | 2.76599    | 0.551 | 5.0230   | 568  | < .001      |
| LH         | V2          | dorsal  | - RH       | V3          | ventral | 2.56314    | 0.612 | 4.1899   | 369  | 0.002       |
| LH         | V2          | ventral | - LH       | V3          | ventral | -0.93927   | 0.486 | -1.9331  | 1225 | 1.000       |
| LH         | V2          | ventral | - RH       | V2          | ventral | 1.01851    | 0.517 | 1.9702   | 1168 | 1.000       |
| LH         | V2          | ventral | - RH       | V3          | ventral | -1.13519   | 0.544 | -2.0875  | 547  | 1.000       |
| LH         | V3          | dorsal  | - LH       | V1          | ventral | 7.21690    | 0.578 | 12.4954  | 671  | < .001      |
| LH         | V3          | dorsal  | - LH       | V2          | ventral | 4.22578    | 0.515 | 8.1977   | 656  | < .001      |
| LH         | V3          | dorsal  | - LH       | V3          | ventral | 3.28651    | 0.525 | 6.2617   | 1167 | < .001      |
| LH         | V3          | dorsal  | - RH       | V1          | ventral | 8.07985    | 0.602 | 13.4198  | 448  | < .001      |
| LH         | V3          | dorsal  | - RH       | V2          | ventral | 5.24430    | 0.532 | 9.8526   | 408  | < .001      |
| LH         | V3          | dorsal  | - RH       | V3          | dorsal  | 3.29344    | 0.517 | 6.3654   | 1171 | < .001      |
| LH         | V3          | dorsal  | - RH       | V3          | ventral | 3.09059    | 0.560 | 5.5227   | 625  | < .001      |
| LH         | V3          | ventral | - RH       | V3          | ventral | -0.19592   | 0.516 | -0.3796  | 1165 | 1.000       |
| RH         | V1          | dorsal  | - LH       | V1          | ventral | 0.92271    | 0.556 | 1.6595   | 638  | 1.000       |
| RH         | V1          | dorsal  | - LH       | V2          | dorsal  | -5.76675   | 0.592 | -9.7469  | 693  | < .001      |
| RH         | V1          | dorsal  | - LH       | V2          | ventral | -2.06841   | 0.581 | -3.5603  | 386  | 0.027       |
| RH         | V1          | dorsal  | - LH       | V3          | dorsal  | -6.29420   | 0.540 | -11.6460 | 675  | < .001      |
| RH         | V1          | dorsal  | - LH       | V3          | ventral | -3.00769   | 0.566 | -5.3167  | 385  | < .001      |
| RH         | V1          | dorsal  | - RH       | V1          | ventral | 1.78566    | 0.524 | 3.4070   | 1164 | 0.045       |
| RH         | V1          | dorsal  | - RH       | V2          | dorsal  | -0.18575   | 0.528 | -0.3515  | 1187 | 1.000       |
| RH         | V1          | dorsal  | - RH       | V2          | ventral | -1.04990   | 0.536 | -1.9577  | 627  | 1.000       |
| RH         | V1          | dorsal  | - RH       | V3          | dorsal  | -3.00076   | 0.527 | -5.6920  | 1176 | < .001      |
| RH         | V1          | dorsal  | - RH       | V3          | ventral | -3.20361   | 0.549 | -5.8368  | 595  | < .001      |
| RH         | V1          | ventral | - LH       | V2          | ventral | -3.85407   | 0.578 | -6.6693  | 649  | < .001      |
| RH         | V1          | ventral | - LH       | V3          | ventral | -4.79334   | 0.547 | -8.7655  | 694  | < .001      |
| RH         | V1          | ventral | - RH       | V2          | ventral | -2.83556   | 0.528 | -5.3732  | 1177 | < .001      |
| RH         | V1          | ventral | - RH       | V3          | ventral | -4.98926   | 0.530 | -9.4224  | 1182 | < .001      |
| RH         | V2          | dorsal  | - LH       | V1          | ventral | 1.10846    | 0.617 | 1.7951   | 432  | 1.000       |
| RH         | V2          | dorsal  | - LH       | V2          | ventral | -1.88266   | 0.555 | -3.3908  | 635  | 0.049       |
| RH         | V2          | dorsal  | - LH       | V3          | dorsal  | -6.10844   | 0.510 | -11.9715 | 747  | < .001      |

| Comparison |             |         |            |             |         | Difference | SE    | t       | df   | Pbonferroni |
|------------|-------------|---------|------------|-------------|---------|------------|-------|---------|------|-------------|
| Hemisphere | Visual area | Half    | Hemisphere | Visual area | Half    |            |       |         |      |             |
| RH         | V2          | dorsal  | - LH       | V3          | ventral | -2.82193   | 0.555 | -5.0859 | 388  | < .001      |
| RH         | V2          | dorsal  | - RH       | V1          | ventral | 1.97141    | 0.597 | 3.3011  | 658  | 0.067       |
| RH         | V2          | dorsal  | - RH       | V2          | ventral | -0.86415   | 0.525 | -1.6453 | 1167 | 1.000       |
| RH         | V2          | dorsal  | - RH       | V3          | dorsal  | -2.81500   | 0.491 | -5.7386 | 1249 | < .001      |
| RH         | V2          | dorsal  | - RH       | V3          | ventral | -3.01785   | 0.542 | -5.5703 | 581  | < .001      |
| RH         | V2          | ventral | - LH       | V3          | ventral | -1.95779   | 0.499 | -3.9250 | 700  | 0.006       |
| RH         | V2          | ventral | - RH       | V3          | ventral | -2.15371   | 0.484 | -4.4523 | 1212 | < .001      |
| RH         | V3          | dorsal  | - LH       | V1          | ventral | 3.92347    | 0.629 | 6.2401  | 428  | < .001      |
| RH         | V3          | dorsal  | - LH       | V2          | ventral | 0.93235    | 0.569 | 1.6383  | 359  | 1.000       |
| RH         | V3          | dorsal  | - LH       | V3          | ventral | -0.00693   | 0.559 | -0.0124 | 648  | 1.000       |
| RH         | V3          | dorsal  | - RH       | V1          | ventral | 4.78641    | 0.591 | 8.1016  | 709  | < .001      |
| RH         | V3          | dorsal  | - RH       | V2          | ventral | 1.95086    | 0.518 | 3.7681  | 665  | 0.012       |
| RH         | V3          | dorsal  | - RH       | V3          | ventral | -0.20285   | 0.524 | -0.3873 | 1164 | 1.000       |

## References

- [1] The jamovi project (2022). *jamovi*. (Version 2.3) [Computer Software]. Retrieved from <https://www.jamovi.org>.
- [2] R Core Team (2021). *R: A Language and environment for statistical computing*. (Version 4.1) [Computer software]. Retrieved from <https://cran.r-project.org>. (R packages retrieved from MRAN snapshot 2022-01-01).
- [3] Gallucci, M. (2019). *GAMLj: General analyses for linear models*. [jamovi module]. Retrieved from <https://gamlj.github.io/>.
