# Supplementary material for: Variability of visual field maps in human early extrastriate cortex challenges the canonical model of organization of V2 and V3
Source: eLife journal article supplement (doi:10.7554/elife.86439), 2023-08-03
Supplement: supp4 [file elife-86439-supp4-v1.pdf]

# Results - Eccentricity

## Mixed Model

### Model Info

---

| Info                  |                                                                                                                                                                                                                                                                                                                                      |
|-----------------------|--------------------------------------------------------------------------------------------------------------------------------------------------------------------------------------------------------------------------------------------------------------------------------------------------------------------------------------|
| Estimate              | Linear mixed model fit by REML                                                                                                                                                                                                                                                                                                       |
| Call                  | Mean difference from the average map ~ 1 + Hemisphere + Visual area + Half + Mean difference in curvature + Mean difference in normalized mean BOLD + Mean intra-individual variability + Hemisphere:Visual area + Hemisphere:Half + Visual area:Half + Hemisphere:Visual area:Half+( 1 + Hemisphere + Visual area + Half   HCP_ID ) |
| AIC                   | 249.170                                                                                                                                                                                                                                                                                                                              |
| BIC                   | 522.536                                                                                                                                                                                                                                                                                                                              |
| LogLikel.             | -142.175                                                                                                                                                                                                                                                                                                                             |
| R-squared Marginal    | 0.364                                                                                                                                                                                                                                                                                                                                |
| R-squared Conditional | 0.725                                                                                                                                                                                                                                                                                                                                |
| Converged             | yes                                                                                                                                                                                                                                                                                                                                  |
| Optimizer             | bobyqa                                                                                                                                                                                                                                                                                                                               |

---

Note. (Almost) singular fit. Maybe random coefficients variances are too small or correlations among them too large.

Note. boundary (singular) fit: see help("isSingular")

[3]

## Model Results

### Fixed Effect Omnibus tests

---

|                                         | F      | Num df | Den df | p      |
|-----------------------------------------|--------|--------|--------|--------|
| Hemisphere                              | 40.99  | 1      | 201    | < .001 |
| Visual area                             | 1.20   | 2      | 312    | 0.303  |
| Half                                    | 10.48  | 1      | 186    | 0.001  |
| Mean difference in curvature            | 2.32   | 1      | 1829   | 0.128  |
| Mean difference in normalized mean BOLD | 5.49   | 1      | 489    | 0.020  |
| Mean intra-individual variability       | 702.87 | 1      | 1982   | < .001 |
| Hemisphere * Visual area                | 1.34   | 2      | 1463   | 0.262  |
| Hemisphere * Half                       | 73.49  | 1      | 1553   | < .001 |
| Visual area * Half                      | 3.29   | 2      | 1462   | 0.038  |
| Hemisphere * Visual area * Half         | 2.14   | 2      | 1447   | 0.118  |

---

Note. Satterthwaite method for degrees of freedom

Fixed Effects Parameter Estimates

| Names                                   | Effect                                  | Estimate | SE      | 95% Confidence Interval |          | df   | t      | p      |
|-----------------------------------------|-----------------------------------------|----------|---------|-------------------------|----------|------|--------|--------|
|                                         |                                         |          |         | Lower                   | Upper    |      |        |        |
| (Intercept)                             | (Intercept)                             | 0.80970  | 0.01482 | 0.78066                 | 0.83875  | 179  | 54.642 | < .001 |
| Hemisphere1                             | RH - LH                                 | -0.06974 | 0.01089 | -0.09110                | -0.04839 | 201  | -6.402 | < .001 |
| Visual area1                            | V2 - V1                                 | -0.02229 | 0.01464 | -0.05098                | 0.00640  | 506  | -1.523 | 0.128  |
| Visual area2                            | V3 - V1                                 | -0.01960 | 0.01633 | -0.05160                | 0.01241  | 262  | -1.200 | 0.231  |
| Half1                                   | ventral - dorsal                        | -0.06971 | 0.02154 | -0.11192                | -0.02750 | 186  | -3.237 | 0.001  |
| Mean difference in curvature            | Mean difference in curvature            | 0.01010  | 0.00662 | -0.00289                | 0.02308  | 1829 | 1.524  | 0.128  |
| Mean difference in normalized mean BOLD | Mean difference in normalized mean BOLD | 0.01856  | 0.00792 | 0.00304                 | 0.03408  | 489  | 2.343  | 0.020  |
| Mean intra-individual variability       | Mean intra-individual variability       | 0.21122  | 0.00797 | 0.19560                 | 0.22683  | 1982 | 26.512 | < .001 |
| Hemisphere1 * Visual area1              | RH - LH * V2 - V1                       | -0.00710 | 0.02202 | -0.05026                | 0.03605  | 1439 | -0.323 | 0.747  |
| Hemisphere1 * Visual area2              | RH - LH * V3 - V1                       | 0.02780  | 0.02236 | -0.01603                | 0.07162  | 1472 | 1.243  | 0.214  |
| Hemisphere1 * Half1                     | RH - LH * ventral - dorsal              | 0.16236  | 0.01894 | 0.12524                 | 0.19948  | 1553 | 8.573  | < .001 |
| Visual area1 * Half1                    | V2 - V1 * ventral - dorsal              | 0.02676  | 0.02212 | -0.01660                | 0.07012  | 1451 | 1.210  | 0.227  |
| Visual area2 * Half1                    | V3 - V1 * ventral - dorsal              | 0.05757  | 0.02246 | 0.01354                 | 0.10160  | 1485 | 2.563  | 0.010  |
| Hemisphere1 * Visual area1 * Half1      | RH - LH * V2 - V1 * ventral - dorsal    | 0.01609  | 0.04419 | -0.07052                | 0.10270  | 1447 | 0.364  | 0.716  |
| Hemisphere1 * Visual area2 * Half1      | RH - LH * V3 - V1 * ventral - dorsal    | -0.06999 | 0.04409 | -0.15641                | 0.01644  | 1442 | -1.587 | 0.113  |

Random Components

| Groups   | Name         | SD     | Variance | ICC   |
|----------|--------------|--------|----------|-------|
| HCP_ID   | (Intercept)  | 0.1900 | 0.03609  | 0.451 |
|          | Hemisphere1  | 0.0755 | 0.00570  |       |
|          | Visual area1 | 0.0719 | 0.00517  |       |
|          | Visual area2 | 0.1289 | 0.01661  |       |
|          | Half1        | 0.2588 | 0.06695  |       |
| Residual |              | 0.2094 | 0.04384  |       |

Note. Number of Obs: 2172 , groups: HCP\_ID 181

Random Parameters correlations

| Groups | Param.1      | Param.2      | Corr.   |
|--------|--------------|--------------|---------|
| HCP_ID | (Intercept)  | Hemisphere1  | -0.1126 |
|        | (Intercept)  | Visual area1 | 0.2636  |
|        | (Intercept)  | Visual area2 | -0.1896 |
|        | (Intercept)  | Half1        | -0.6842 |
|        | Hemisphere1  | Visual area1 | -0.2453 |
|        | Hemisphere1  | Visual area2 | 0.0909  |
|        | Hemisphere1  | Half1        | 0.1587  |
|        | Visual area1 | Visual area2 | 0.7024  |
|        | Visual area1 | Half1        | -0.6133 |
|        | Visual area2 | Half1        | 0.0854  |

## Post Hoc Tests

### Post Hoc Comparisons - Hemisphere

| Comparison |            |            |        |      |     |                         |
|------------|------------|------------|--------|------|-----|-------------------------|
| Hemisphere | Hemisphere | Difference | SE     | t    | df  | P <sub>bonferroni</sub> |
| LH         | - RH       | 0.0697     | 0.0109 | 6.40 | 198 | < .001                  |

### Post Hoc Comparisons - Visual area

| Comparison  |             |            |        |        |     |                         |
|-------------|-------------|------------|--------|--------|-----|-------------------------|
| Visual area | Visual area | Difference | SE     | t      | df  | P <sub>bonferroni</sub> |
| V1          | - V2        | 0.02229    | 0.0147 | 1.517  | 318 | 0.391                   |
| V1          | - V3        | 0.01960    | 0.0164 | 1.197  | 264 | 0.697                   |
| V2          | - V3        | -0.00269   | 0.0131 | -0.205 | 186 | 1.000                   |

### Post Hoc Comparisons - Half

| Comparison |           |            |        |      |     |                         |
|------------|-----------|------------|--------|------|-----|-------------------------|
| Half       | Half      | Difference | SE     | t    | df  | P <sub>bonferroni</sub> |
| dorsal     | - ventral | 0.0697     | 0.0215 | 3.24 | 190 | 0.001                   |

### Post Hoc Comparisons - Hemisphere \* Visual area

| Comparison |             |            |             |            |        |        |     |                         |
|------------|-------------|------------|-------------|------------|--------|--------|-----|-------------------------|
| Hemisphere | Visual area | Hemisphere | Visual area | Difference | SE     | t      | df  | P <sub>bonferroni</sub> |
| LH         | V1          | - LH       | V2          | 0.01874    | 0.0185 | 1.013  | 698 | 1.000                   |
| LH         | V1          | - LH       | V3          | 0.03349    | 0.0193 | 1.737  | 492 | 1.000                   |
| LH         | V1          | - RH       | V1          | 0.07664    | 0.0170 | 4.519  | 872 | < .001                  |
| LH         | V1          | - RH       | V2          | 0.10248    | 0.0185 | 5.553  | 315 | < .001                  |
| LH         | V1          | - RH       | V3          | 0.08234    | 0.0206 | 3.992  | 277 | 0.001                   |
| LH         | V2          | - LH       | V3          | 0.01476    | 0.0173 | 0.855  | 511 | 1.000                   |
| LH         | V2          | - RH       | V2          | 0.08375    | 0.0171 | 4.911  | 883 | < .001                  |
| LH         | V2          | - RH       | V3          | 0.06360    | 0.0187 | 3.403  | 232 | 0.012                   |
| LH         | V3          | - RH       | V3          | 0.04885    | 0.0166 | 2.946  | 827 | 0.050                   |
| RH         | V1          | - LH       | V2          | -0.05790   | 0.0207 | -2.801 | 380 | 0.080                   |
| RH         | V1          | - LH       | V3          | -0.04315   | 0.0206 | -2.098 | 304 | 0.551                   |
| RH         | V1          | - RH       | V2          | 0.02584    | 0.0182 | 1.418  | 676 | 1.000                   |
| RH         | V1          | - RH       | V3          | 0.00570    | 0.0204 | 0.280  | 571 | 1.000                   |
| RH         | V2          | - LH       | V3          | -0.06899   | 0.0176 | -3.921 | 256 | 0.002                   |
| RH         | V2          | - RH       | V3          | -0.02014   | 0.0173 | -1.162 | 518 | 1.000                   |

Post Hoc Comparisons - Hemisphere \* Half

| Comparison |         |            |         | Difference | SE     | t        | df  | P <sub>bonferroni</sub> |
|------------|---------|------------|---------|------------|--------|----------|-----|-------------------------|
| Hemisphere | Half    | Hemisphere | Half    |            |        |          |     |                         |
| LH         | dorsal  | - LH       | ventral | 0.1509     | 0.0238 | 6.33618  | 280 | < .001                  |
| LH         | dorsal  | - RH       | dorsal  | 0.1509     | 0.0150 | 10.08118 | 611 | < .001                  |
| LH         | dorsal  | - RH       | ventral | 0.1395     | 0.0251 | 5.55089  | 199 | < .001                  |
| LH         | ventral | - RH       | ventral | -0.0114    | 0.0139 | -0.82181 | 495 | 1.000                   |
| RH         | dorsal  | - LH       | ventral | -3.62e-5   | 0.0231 | -0.00156 | 184 | 1.000                   |
| RH         | dorsal  | - RH       | ventral | -0.0115    | 0.0233 | -0.49300 | 257 | 1.000                   |

Post Hoc Comparisons - Visual area \* Half

| Comparison  |         |             |         | Difference | SE     | t      | df  | P <sub>bonferroni</sub> |
|-------------|---------|-------------|---------|------------|--------|--------|-----|-------------------------|
| Visual area | Half    | Visual area | Half    |            |        |        |     |                         |
| V1          | dorsal  | - V1        | ventral | 0.09782    | 0.0253 | 3.860  | 354 | 0.002                   |
| V1          | dorsal  | - V2        | dorsal  | 0.03567    | 0.0182 | 1.956  | 677 | 0.763                   |
| V1          | dorsal  | - V2        | ventral | 0.10673    | 0.0233 | 4.588  | 231 | < .001                  |
| V1          | dorsal  | - V3        | dorsal  | 0.04838    | 0.0193 | 2.502  | 495 | 0.190                   |
| V1          | dorsal  | - V3        | ventral | 0.08863    | 0.0275 | 3.228  | 210 | 0.022                   |
| V1          | ventral | - V2        | ventral | 0.00891    | 0.0186 | 0.480  | 704 | 1.000                   |
| V1          | ventral | - V3        | ventral | -0.00919   | 0.0204 | -0.451 | 573 | 1.000                   |
| V2          | dorsal  | - V1        | ventral | 0.06215    | 0.0302 | 2.055  | 276 | 0.613                   |
| V2          | dorsal  | - V2        | ventral | 0.07106    | 0.0250 | 2.838  | 340 | 0.072                   |
| V2          | dorsal  | - V3        | dorsal  | 0.01271    | 0.0171 | 0.742  | 499 | 1.000                   |
| V2          | dorsal  | - V3        | ventral | 0.05296    | 0.0289 | 1.833  | 207 | 1.000                   |
| V2          | ventral | - V3        | ventral | -0.01810   | 0.0172 | -1.049 | 510 | 1.000                   |
| V3          | dorsal  | - V1        | ventral | 0.04944    | 0.0281 | 1.759  | 272 | 1.000                   |
| V3          | dorsal  | - V2        | ventral | 0.05835    | 0.0226 | 2.581  | 218 | 0.158                   |
| V3          | dorsal  | - V3        | ventral | 0.04025    | 0.0249 | 1.618  | 332 | 1.000                   |

Post Hoc Comparisons - Hemisphere \* Visual area \* Half

| Comparison |             |         |            |             |         | Difference | SE     | t       | df   | Pbonferroni |
|------------|-------------|---------|------------|-------------|---------|------------|--------|---------|------|-------------|
| Hemisphere | Visual area | Half    | Hemisphere | Visual area | Half    |            |        |         |      |             |
| LH         | V1          | dorsal  | - LH       | V1          | ventral | 0.18798    | 0.0303 | 6.2098  | 645  | < .001      |
| LH         | V1          | dorsal  | - LH       | V2          | dorsal  | 0.02810    | 0.0240 | 1.1685  | 1225 | 1.000       |
| LH         | V1          | dorsal  | - LH       | V2          | ventral | 0.19736    | 0.0284 | 6.9479  | 480  | < .001      |
| LH         | V1          | dorsal  | - LH       | V3          | dorsal  | 0.07978    | 0.0245 | 3.2530  | 967  | 0.078       |
| LH         | V1          | dorsal  | - LH       | V3          | ventral | 0.17519    | 0.0317 | 5.5322  | 362  | < .001      |
| LH         | V1          | dorsal  | - RH       | V1          | dorsal  | 0.16680    | 0.0236 | 7.0770  | 1408 | < .001      |
| LH         | V1          | dorsal  | - RH       | V1          | ventral | 0.17446    | 0.0316 | 5.5159  | 469  | < .001      |
| LH         | V1          | dorsal  | - RH       | V2          | dorsal  | 0.21005    | 0.0249 | 8.4506  | 834  | < .001      |
| LH         | V1          | dorsal  | - RH       | V2          | ventral | 0.18290    | 0.0290 | 6.3033  | 336  | < .001      |
| LH         | V1          | dorsal  | - RH       | V3          | dorsal  | 0.18379    | 0.0259 | 7.0889  | 620  | < .001      |
| LH         | V1          | dorsal  | - RH       | V3          | ventral | 0.16887    | 0.0327 | 5.1618  | 280  | < .001      |
| LH         | V1          | ventral | - LH       | V2          | ventral | 0.00938    | 0.0243 | 0.3855  | 1239 | 1.000       |
| LH         | V1          | ventral | - LH       | V3          | ventral | -0.01279   | 0.0253 | -0.5048 | 1030 | 1.000       |
| LH         | V1          | ventral | - RH       | V1          | ventral | -0.01352   | 0.0228 | -0.5940 | 1335 | 1.000       |
| LH         | V1          | ventral | - RH       | V2          | ventral | -0.00508   | 0.0243 | -0.2090 | 779  | 1.000       |
| LH         | V1          | ventral | - RH       | V3          | ventral | -0.01911   | 0.0265 | -0.7203 | 658  | 1.000       |
| LH         | V2          | dorsal  | - LH       | V1          | ventral | 0.15988    | 0.0349 | 4.5813  | 467  | < .001      |
| LH         | V2          | dorsal  | - LH       | V2          | ventral | 0.16926    | 0.0301 | 5.6147  | 637  | < .001      |
| LH         | V2          | dorsal  | - LH       | V3          | dorsal  | 0.05168    | 0.0235 | 2.2017  | 1109 | 1.000       |
| LH         | V2          | dorsal  | - LH       | V3          | ventral | 0.14710    | 0.0333 | 4.4130  | 356  | < .001      |
| LH         | V2          | dorsal  | - RH       | V1          | ventral | 0.14636    | 0.0364 | 4.0203  | 379  | 0.005       |
| LH         | V2          | dorsal  | - RH       | V2          | dorsal  | 0.18195    | 0.0242 | 7.5074  | 1464 | < .001      |
| LH         | V2          | dorsal  | - RH       | V2          | ventral | 0.15480    | 0.0313 | 4.9492  | 453  | < .001      |
| LH         | V2          | dorsal  | - RH       | V3          | dorsal  | 0.15569    | 0.0248 | 6.2685  | 631  | < .001      |
| LH         | V2          | dorsal  | - RH       | V3          | ventral | 0.14077    | 0.0344 | 4.0968  | 275  | 0.004       |
| LH         | V2          | ventral | - LH       | V3          | ventral | -0.02216   | 0.0232 | -0.9534 | 1091 | 1.000       |
| LH         | V2          | ventral | - RH       | V2          | ventral | -0.01446   | 0.0228 | -0.6348 | 1337 | 1.000       |
| LH         | V2          | ventral | - RH       | V3          | ventral | -0.02849   | 0.0246 | -1.1590 | 614  | 1.000       |
| LH         | V3          | dorsal  | - LH       | V1          | ventral | 0.10820    | 0.0320 | 3.3864  | 439  | 0.051       |
| LH         | V3          | dorsal  | - LH       | V2          | ventral | 0.11758    | 0.0276 | 4.2654  | 456  | 0.002       |
| LH         | V3          | dorsal  | - LH       | V3          | ventral | 0.09542    | 0.0294 | 3.2474  | 590  | 0.081       |
| LH         | V3          | dorsal  | - RH       | V1          | ventral | 0.09469    | 0.0331 | 2.8614  | 349  | 0.295       |
| LH         | V3          | dorsal  | - RH       | V2          | ventral | 0.10312    | 0.0283 | 3.6479  | 328  | 0.020       |
| LH         | V3          | dorsal  | - RH       | V3          | dorsal  | 0.10401    | 0.0229 | 4.5450  | 1347 | < .001      |
| LH         | V3          | dorsal  | - RH       | V3          | ventral | 0.08909    | 0.0304 | 2.9335  | 411  | 0.234       |
| LH         | V3          | ventral | - RH       | V3          | ventral | -0.00632   | 0.0228 | -0.2773 | 1340 | 1.000       |
| RH         | V1          | dorsal  | - LH       | V1          | ventral | 0.02118    | 0.0293 | 0.7225  | 449  | 1.000       |
| RH         | V1          | dorsal  | - LH       | V2          | dorsal  | -0.13871   | 0.0265 | -5.2305 | 842  | < .001      |
| RH         | V1          | dorsal  | - LH       | V2          | ventral | 0.03056    | 0.0284 | 1.0754  | 352  | 1.000       |
| RH         | V1          | dorsal  | - LH       | V3          | dorsal  | -0.08703   | 0.0257 | -3.3912 | 658  | 0.049       |
| RH         | V1          | dorsal  | - LH       | V3          | ventral | 0.00839    | 0.0315 | 0.2661  | 300  | 1.000       |
| RH         | V1          | dorsal  | - RH       | V1          | ventral | 0.00766    | 0.0294 | 0.2603  | 592  | 1.000       |
| RH         | V1          | dorsal  | - RH       | V2          | dorsal  | 0.04325    | 0.0240 | 1.8055  | 1221 | 1.000       |
| RH         | V1          | dorsal  | - RH       | V2          | ventral | 0.01610    | 0.0280 | 0.5753  | 459  | 1.000       |
| RH         | V1          | dorsal  | - RH       | V3          | dorsal  | 0.01699    | 0.0254 | 0.6697  | 1026 | 1.000       |
| RH         | V1          | dorsal  | - RH       | V3          | ventral | 0.00207    | 0.0320 | 0.0646  | 376  | 1.000       |
| RH         | V1          | ventral | - LH       | V2          | ventral | 0.02290    | 0.0255 | 0.8994  | 761  | 1.000       |
| RH         | V1          | ventral | - LH       | V3          | ventral | 7.33e-4    | 0.0260 | 0.0282  | 676  | 1.000       |
| RH         | V1          | ventral | - RH       | V2          | ventral | 0.00844    | 0.0242 | 0.3494  | 1237 | 1.000       |
| RH         | V1          | ventral | - RH       | V3          | ventral | -0.00559   | 0.0260 | -0.2148 | 1082 | 1.000       |
| RH         | V2          | dorsal  | - LH       | V1          | ventral | -0.02207   | 0.0331 | -0.6660 | 335  | 1.000       |
| RH         | V2          | dorsal  | - LH       | V2          | ventral | -0.01269   | 0.0293 | -0.4335 | 447  | 1.000       |
| RH         | V2          | dorsal  | - LH       | V3          | dorsal  | -0.13027   | 0.0239 | -5.4436 | 730  | < .001      |

| Comparison |             |         |            |             |         | Difference | SE     | t       | df   | Pbonferroni |
|------------|-------------|---------|------------|-------------|---------|------------|--------|---------|------|-------------|
| Hemisphere | Visual area | Half    | Hemisphere | Visual area | Half    |            |        |         |      |             |
| RH         | V2          | dorsal  | - LH       | V3          | ventral | -0.03485   | 0.0325 | -1.0716 | 287  | 1.000       |
| RH         | V2          | dorsal  | - RH       | V1          | ventral | -0.03559   | 0.0335 | -1.0615 | 408  | 1.000       |
| RH         | V2          | dorsal  | - RH       | V2          | ventral | -0.02715   | 0.0295 | -0.9206 | 596  | 1.000       |
| RH         | V2          | dorsal  | - RH       | V3          | dorsal  | -0.02626   | 0.0233 | -1.1264 | 1094 | 1.000       |
| RH         | V2          | dorsal  | - RH       | V3          | ventral | -0.04118   | 0.0331 | -1.2430 | 348  | 1.000       |
| RH         | V2          | ventral | - LH       | V3          | ventral | -0.00771   | 0.0233 | -0.3312 | 677  | 1.000       |
| RH         | V2          | ventral | - RH       | V3          | ventral | -0.01403   | 0.0233 | -0.6027 | 1091 | 1.000       |
| RH         | V3          | dorsal  | - LH       | V1          | ventral | 0.00419    | 0.0322 | 0.1300  | 358  | 1.000       |
| RH         | V3          | dorsal  | - LH       | V2          | ventral | 0.01357    | 0.0278 | 0.4883  | 329  | 1.000       |
| RH         | V3          | dorsal  | - LH       | V3          | ventral | -0.00860   | 0.0294 | -0.2923 | 454  | 1.000       |
| RH         | V3          | dorsal  | - RH       | V1          | ventral | -0.00933   | 0.0324 | -0.2882 | 458  | 1.000       |
| RH         | V3          | dorsal  | - RH       | V2          | ventral | -8.89e-4   | 0.0275 | -0.0323 | 453  | 1.000       |
| RH         | V3          | dorsal  | - RH       | V3          | ventral | -0.01492   | 0.0295 | -0.5064 | 594  | 1.000       |

## References

- [1] The jamovi project (2022). *jamovi*. (Version 2.3) [Computer Software]. Retrieved from <https://www.jamovi.org>.
- [2] R Core Team (2021). *R: A Language and environment for statistical computing*. (Version 4.1) [Computer software]. Retrieved from <https://cran.r-project.org>. (R packages retrieved from MRAN snapshot 2022-01-01).
- [3] Gallucci, M. (2019). *GAMLj: General analyses for linear models*. [jamovi module]. Retrieved from <https://gamlj.github.io/>.
