# Supplementary material for: Variability of visual field maps in human early extrastriate cortex challenges the canonical model of organization of V2 and V3
Source: eLife journal article supplement (doi:10.7554/elife.86439), 2023-08-03
Supplement: supp5 [file elife-86439-supp5-v1.pdf]

# Results - Polar angle

## Mixed Model

### Model Info

| Info                  |                                                                                                                                                                                                                                                                                                                                                                                   |
|-----------------------|-----------------------------------------------------------------------------------------------------------------------------------------------------------------------------------------------------------------------------------------------------------------------------------------------------------------------------------------------------------------------------------|
| Estimate              | Linear mixed model fit by REML                                                                                                                                                                                                                                                                                                                                                    |
| Call                  | Mean difference from the average map ~ 1 + Hemisphere + Visual area + Half + Mean difference in curvature + Mean difference in normalized mean BOLD + Mean intra-individual variability + Age_in_Yrs + Hemisphere GM volume + Gender + Hemisphere:Visual area + Hemisphere:Half + Visual area:Half + Hemisphere:Visual area:Half+( 1 + Hemisphere + Visual area + Half   HCP_ID ) |
| AIC                   | 13485.256                                                                                                                                                                                                                                                                                                                                                                         |
| BIC                   | 13684.334                                                                                                                                                                                                                                                                                                                                                                         |
| LogLikel.             | -6711.549                                                                                                                                                                                                                                                                                                                                                                         |
| R-squared Marginal    | 0.341                                                                                                                                                                                                                                                                                                                                                                             |
| R-squared Conditional | 0.627                                                                                                                                                                                                                                                                                                                                                                             |
| Converged             | yes                                                                                                                                                                                                                                                                                                                                                                               |
| Optimizer             | bobyqa                                                                                                                                                                                                                                                                                                                                                                            |

Note. (Almost) singular fit. Maybe random coefficients variances are too small or correlations among them too large.

Note. boundary (singular) fit: see help("isSingular")

[3]

## Model Results

### Fixed Effect Omnibus tests

|                                         | F        | Num df | Den df | p      |
|-----------------------------------------|----------|--------|--------|--------|
| Hemisphere                              | 70.9652  | 1      | 215    | < .001 |
| Visual area                             | 66.2794  | 2      | 383    | < .001 |
| Half                                    | 51.5983  | 1      | 207    | < .001 |
| Mean difference in curvature            | 7.9812   | 1      | 1807   | 0.005  |
| Mean difference in normalized mean BOLD | 1.0838   | 1      | 596    | 0.298  |
| Mean intra-individual variability       | 317.7963 | 1      | 1361   | < .001 |
| Age_in_Yrs                              | 0.9148   | 1      | 179    | 0.340  |
| Hemisphere GM volume                    | 0.0332   | 1      | 222    | 0.856  |
| Gender                                  | 0.0432   | 1      | 191    | 0.836  |
| Hemisphere * Visual area                | 6.4385   | 2      | 1461   | 0.002  |
| Hemisphere * Half                       | 86.6869  | 1      | 1518   | < .001 |
| Visual area * Half                      | 10.4238  | 2      | 1451   | < .001 |
| Hemisphere * Visual area * Half         | 1.1046   | 2      | 1453   | 0.332  |

Note. Satterthwaite method for degrees of freedom

Fixed Effects Parameter Estimates

| Names                                   | Effect                                  | Estimate | SE    | 95% Confidence Interval |        | df   | t      | p     |
|-----------------------------------------|-----------------------------------------|----------|-------|-------------------------|--------|------|--------|-------|
|                                         |                                         |          |       | Lower                   | Upper  |      |        |       |
| (Intercept)                             | (Intercept)                             | 18.5998  | 0.279 | 18.0526                 | 19.147 | 178  | 66.624 | <.001 |
| Hemisphere1                             | RH - LH                                 | -2.4483  | 0.291 | -3.0178                 | -1.879 | 215  | -8.425 | <.001 |
| Visual area1                            | V2 - V1                                 | 1.9292   | 0.327 | 1.2880                  | 2.570  | 323  | 5.897  | <.001 |
| Visual area2                            | V3 - V1                                 | 3.5370   | 0.315 | 2.9188                  | 4.155  | 288  | 11.214 | <.001 |
| Half1                                   | ventral - dorsal                        | -2.1113  | 0.294 | -2.6874                 | -1.535 | 207  | -7.184 | <.001 |
| Mean difference in curvature            | Mean difference in curvature            | 0.4025   | 0.142 | 0.1233                  | 0.682  | 1807 | 2.825  | 0.005 |
| Mean difference in normalized mean BOLD | Mean difference in normalized mean BOLD | 0.1948   | 0.187 | -0.1720                 | 0.562  | 596  | 1.041  | 0.298 |
| Mean intra-individual variability       | Mean intra-individual variability       | 2.9146   | 0.163 | 2.5942                  | 3.235  | 1361 | 17.827 | <.001 |
| Age_in_Yrs                              | Age_in_Yrs                              | 0.2881   | 0.301 | -0.3023                 | 0.878  | 179  | 0.956  | 0.340 |
| Hemisphere GM volume                    | Hemisphere GM volume                    | 0.0648   | 0.355 | -0.6318                 | 0.761  | 222  | 0.182  | 0.856 |
| Gender1                                 | M - F                                   | 0.1560   | 0.750 | -1.3147                 | 1.627  | 191  | 0.208  | 0.836 |
| Hemisphere1 * Visual area1              | RH - LH * V2 - V1                       | -0.8357  | 0.479 | -1.7737                 | 0.102  | 1442 | -1.746 | 0.081 |
| Hemisphere1 * Visual area2              | RH - LH * V3 - V1                       | 0.9110   | 0.483 | -0.0352                 | 1.857  | 1462 | 1.887  | 0.059 |
| Hemisphere1 * Half1                     | RH - LH * ventral - dorsal              | 3.7425   | 0.402 | 2.9547                  | 4.530  | 1518 | 9.311  | <.001 |
| Visual area1 * Half1                    | V2 - V1 * ventral - dorsal              | 1.9632   | 0.481 | 1.0211                  | 2.905  | 1455 | 4.084  | <.001 |
| Visual area2 * Half1                    | V3 - V1 * ventral - dorsal              | 1.8388   | 0.481 | 0.8962                  | 2.781  | 1456 | 3.823  | <.001 |
| Hemisphere1 * Visual area1 * Half1      | RH - LH * V2 - V1 * ventral - dorsal    | 1.3587   | 0.958 | -0.5195                 | 3.237  | 1446 | 1.418  | 0.156 |
| Hemisphere1 * Visual area2 * Half1      | RH - LH * V3 - V1 * ventral - dorsal    | 0.2971   | 0.959 | -1.5834                 | 2.178  | 1448 | 0.310  | 0.757 |

Random Components

| Groups   | Name         | SD   | Variance | ICC   |
|----------|--------------|------|----------|-------|
| HCP_ID   | (Intercept)  | 3.36 | 11.32    | 0.354 |
|          | Hemisphere1  | 2.61 | 6.83     |       |
|          | Visual area1 | 1.93 | 3.71     |       |
|          | Visual area2 | 1.89 | 3.58     |       |
|          | Half1        | 2.72 | 7.42     |       |
| Residual |              | 4.55 | 20.66    |       |

Note. Number of Obs: 2172 , groups: HCP\_ID 181

Random Parameters correlations

| Groups | Param.1      | Param.2      | Corr.   |
|--------|--------------|--------------|---------|
| HCP_ID | (Intercept)  | Hemisphere1  | 0.0827  |
|        | (Intercept)  | Visual area1 | -0.1628 |
|        | (Intercept)  | Visual area2 | 0.0907  |
|        | (Intercept)  | Half1        | -0.1172 |
|        | Hemisphere1  | Visual area1 | -0.1400 |
|        | Hemisphere1  | Visual area2 | 0.2789  |
|        | Hemisphere1  | Half1        | 0.0246  |
|        | Visual area1 | Visual area2 | 0.8603  |
|        | Visual area1 | Half1        | -0.2356 |
|        | Visual area2 | Half1        | -0.0177 |

## Post Hoc Tests

Post Hoc Comparisons - Hemisphere

| Comparison |            |            |       |      |     |             |  |
|------------|------------|------------|-------|------|-----|-------------|--|
| Hemisphere | Hemisphere | Difference | SE    | t    | df  | Pbonferroni |  |
| LH         | - RH       | 2.45       | 0.291 | 8.41 | 216 | < .001      |  |

Post Hoc Comparisons - Visual area

| Comparison  |             |            |       |        |     |             |
|-------------|-------------|------------|-------|--------|-----|-------------|
| Visual area | Visual area | Difference | SE    | t      | df  | Pbonferroni |
| V1          | - V2        | -1.93      | 0.328 | -5.88  | 304 | < .001      |
| V1          | - V3        | -3.54      | 0.316 | -11.18 | 273 | < .001      |
| V2          | - V3        | -1.61      | 0.252 | -6.38  | 183 | < .001      |

Post Hoc Comparisons - Half

| Comparison |           |            |       |      |     |             |
|------------|-----------|------------|-------|------|-----|-------------|
| Half       | Half      | Difference | SE    | t    | df  | Pbonferroni |
| dorsal     | - ventral | 2.11       | 0.294 | 7.17 | 211 | < .001      |

Post Hoc Comparisons - Gender

| Comparison |        |            |       |        |     |             |
|------------|--------|------------|-------|--------|-----|-------------|
| Gender     | Gender | Difference | SE    | t      | df  | Pbonferroni |
| F          | - M    | -0.156     | 0.768 | -0.203 | 191 | 0.839       |

Post Hoc Comparisons - Hemisphere \* Visual area

| Comparison |             |            |             | Difference | SE    | t      | df  | Pbonferroni |
|------------|-------------|------------|-------------|------------|-------|--------|-----|-------------|
| Hemisphere | Visual area | Hemisphere | Visual area |            |       |        |     |             |
| LH         | V1          | - LH       | V2          | -2.347     | 0.409 | -5.74  | 654 | < .001      |
| LH         | V1          | - LH       | V3          | -3.081     | 0.390 | -7.91  | 589 | < .001      |
| LH         | V1          | - RH       | V1          | 2.473      | 0.403 | 6.14   | 691 | < .001      |
| LH         | V1          | - RH       | V2          | 0.962      | 0.444 | 2.16   | 309 | 0.467       |
| LH         | V1          | - RH       | V3          | -1.519     | 0.467 | -3.25  | 287 | 0.019       |
| LH         | V2          | - LH       | V3          | -0.734     | 0.352 | -2.09  | 617 | 0.561       |
| LH         | V2          | - RH       | V2          | 3.309      | 0.408 | 8.12   | 713 | < .001      |
| LH         | V2          | - RH       | V3          | 0.828      | 0.436 | 1.90   | 244 | 0.879       |
| LH         | V3          | - RH       | V3          | 1.562      | 0.399 | 3.92   | 672 | 0.001       |
| RH         | V1          | - LH       | V2          | -4.820     | 0.482 | -10.00 | 344 | < .001      |
| RH         | V1          | - LH       | V3          | -5.555     | 0.433 | -12.84 | 311 | < .001      |
| RH         | V1          | - RH       | V2          | -1.511     | 0.404 | -3.75  | 634 | 0.003       |
| RH         | V1          | - RH       | V3          | -3.992     | 0.406 | -9.83  | 646 | < .001      |
| RH         | V2          | - LH       | V3          | -4.043     | 0.379 | -10.67 | 271 | < .001      |
| RH         | V2          | - RH       | V3          | -2.481     | 0.349 | -7.12  | 600 | < .001      |

Post Hoc Comparisons - Hemisphere \* Half

| Comparison |         |            |         | Difference | SE    | t      | df  | Pbonferroni |
|------------|---------|------------|---------|------------|-------|--------|-----|-------------|
| Hemisphere | Half    | Hemisphere | Half    |            |       |        |     |             |
| LH         | dorsal  | - LH       | ventral | 3.983      | 0.365 | 10.924 | 461 | < .001      |
| LH         | dorsal  | - RH       | dorsal  | 4.319      | 0.360 | 11.990 | 477 | < .001      |
| LH         | dorsal  | - RH       | ventral | 4.560      | 0.425 | 10.739 | 229 | < .001      |
| LH         | ventral | - RH       | ventral | 0.577      | 0.348 | 1.660  | 426 | 0.586       |
| RH         | dorsal  | - LH       | ventral | -0.337     | 0.403 | -0.836 | 200 | 1.000       |
| RH         | dorsal  | - RH       | ventral | 0.240      | 0.348 | 0.690  | 404 | 1.000       |

Post Hoc Comparisons - Visual area \* Half

| Comparison  |         |             |         | Difference | SE    | t       | df  | Pbonferroni |
|-------------|---------|-------------|---------|------------|-------|---------|-----|-------------|
| Visual area | Half    | Visual area | Half    |            |       |         |     |             |
| V1          | dorsal  | - V1        | ventral | 3.379      | 0.410 | 8.234   | 682 | < .001      |
| V1          | dorsal  | - V2        | dorsal  | -0.948     | 0.405 | -2.341  | 640 | 0.293       |
| V1          | dorsal  | - V2        | ventral | 0.468      | 0.420 | 1.115   | 262 | 1.000       |
| V1          | dorsal  | - V3        | dorsal  | -2.618     | 0.391 | -6.699  | 591 | < .001      |
| V1          | dorsal  | - V3        | ventral | -1.078     | 0.432 | -2.495  | 252 | 0.198       |
| V1          | ventral | - V2        | ventral | -2.911     | 0.409 | -7.114  | 655 | < .001      |
| V1          | ventral | - V3        | ventral | -4.456     | 0.404 | -11.032 | 639 | < .001      |
| V2          | dorsal  | - V1        | ventral | 4.326      | 0.504 | 8.587   | 363 | < .001      |
| V2          | dorsal  | - V2        | ventral | 1.415      | 0.402 | 3.523   | 647 | 0.007       |
| V2          | dorsal  | - V3        | dorsal  | -1.670     | 0.348 | -4.799  | 596 | < .001      |
| V2          | dorsal  | - V3        | ventral | -0.130     | 0.427 | -0.304  | 248 | 1.000       |
| V2          | ventral | - V3        | ventral | -1.546     | 0.347 | -4.456  | 590 | < .001      |
| V3          | dorsal  | - V1        | ventral | 5.996      | 0.476 | 12.592  | 342 | < .001      |
| V3          | dorsal  | - V2        | ventral | 3.085      | 0.389 | 7.923   | 246 | < .001      |
| V3          | dorsal  | - V3        | ventral | 1.540      | 0.401 | 3.844   | 641 | 0.002       |

Post Hoc Comparisons - Hemisphere \* Visual area \* Half

| Comparison |             |         |            |             |         | Difference | SE    | t        | df   | Pbonferroni |
|------------|-------------|---------|------------|-------------|---------|------------|-------|----------|------|-------------|
| Hemisphere | Visual area | Half    | Hemisphere | Visual area | Half    |            |       |          |      |             |
| LH         | V1          | dorsal  | - LH       | V1          | ventral | 4.9739     | 0.544 | 9.1508   | 1235 | < .001      |
| LH         | V1          | dorsal  | - LH       | V2          | dorsal  | -1.7052    | 0.528 | -3.2312  | 1176 | 0.084       |
| LH         | V1          | dorsal  | - LH       | V2          | ventral | 1.9849     | 0.547 | 3.6306   | 656  | 0.020       |
| LH         | V1          | dorsal  | - LH       | V3          | dorsal  | -2.2363    | 0.512 | -4.3714  | 1140 | < .001      |
| LH         | V1          | dorsal  | - LH       | V3          | ventral | 1.0474     | 0.555 | 1.8874   | 608  | 1.000       |
| LH         | V1          | dorsal  | - RH       | V1          | dorsal  | 4.0686     | 0.534 | 7.6241   | 1256 | < .001      |
| LH         | V1          | dorsal  | - RH       | V1          | ventral | 5.8520     | 0.588 | 9.9600   | 715  | < .001      |
| LH         | V1          | dorsal  | - RH       | V2          | dorsal  | 3.8785     | 0.572 | 6.7819   | 735  | < .001      |
| LH         | V1          | dorsal  | - RH       | V2          | ventral | 3.0194     | 0.577 | 5.2365   | 411  | < .001      |
| LH         | V1          | dorsal  | - RH       | V3          | dorsal  | 1.0698     | 0.576 | 1.8575   | 609  | 1.000       |
| LH         | V1          | dorsal  | - RH       | V3          | ventral | 0.8659     | 0.607 | 1.4262   | 376  | 1.000       |
| LH         | V1          | ventral | - LH       | V2          | ventral | -2.9890    | 0.534 | -5.5994  | 1193 | < .001      |
| LH         | V1          | ventral | - LH       | V3          | ventral | -3.9265    | 0.525 | -7.4853  | 1175 | < .001      |
| LH         | V1          | ventral | - RH       | V1          | ventral | 0.8781     | 0.523 | 1.6788   | 1206 | 1.000       |
| LH         | V1          | ventral | - RH       | V2          | ventral | -1.9545    | 0.560 | -3.4905  | 685  | 0.034       |
| LH         | V1          | ventral | - RH       | V3          | ventral | -4.1080    | 0.582 | -7.0607  | 623  | < .001      |
| LH         | V2          | dorsal  | - LH       | V1          | ventral | 6.6791     | 0.626 | 10.6671  | 745  | < .001      |
| LH         | V2          | dorsal  | - LH       | V2          | ventral | 3.6901     | 0.538 | 6.8580   | 1214 | < .001      |
| LH         | V2          | dorsal  | - LH       | V3          | dorsal  | -0.5312    | 0.493 | -1.0781  | 1253 | 1.000       |
| LH         | V2          | dorsal  | - LH       | V3          | ventral | 2.7525     | 0.562 | 4.8952   | 644  | < .001      |
| LH         | V2          | dorsal  | - RH       | V1          | ventral | 7.5572     | 0.673 | 11.2338  | 498  | < .001      |
| LH         | V2          | dorsal  | - RH       | V2          | dorsal  | 5.5837     | 0.548 | 10.1825  | 1318 | < .001      |
| LH         | V2          | dorsal  | - RH       | V2          | ventral | 4.7245     | 0.583 | 8.0981   | 704  | < .001      |
| LH         | V2          | dorsal  | - RH       | V3          | dorsal  | 2.7750     | 0.556 | 4.9892   | 588  | < .001      |
| LH         | V2          | dorsal  | - RH       | V3          | ventral | 2.5710     | 0.617 | 4.1687   | 380  | 0.003       |
| LH         | V2          | ventral | - LH       | V3          | ventral | -0.9376    | 0.486 | -1.9295  | 1225 | 1.000       |
| LH         | V2          | ventral | - RH       | V2          | ventral | 1.0344     | 0.524 | 1.9756   | 1209 | 1.000       |
| LH         | V2          | ventral | - RH       | V3          | ventral | -1.1191    | 0.550 | -2.0342  | 568  | 1.000       |
| LH         | V3          | dorsal  | - LH       | V1          | ventral | 7.2102     | 0.578 | 12.4788  | 671  | < .001      |
| LH         | V3          | dorsal  | - LH       | V2          | ventral | 4.2213     | 0.516 | 8.1865   | 656  | < .001      |
| LH         | V3          | dorsal  | - LH       | V3          | ventral | 3.2837     | 0.525 | 6.2554   | 1166 | < .001      |
| LH         | V3          | dorsal  | - RH       | V1          | ventral | 8.0883     | 0.607 | 13.3177  | 461  | < .001      |
| LH         | V3          | dorsal  | - RH       | V2          | ventral | 5.2557     | 0.539 | 9.7591   | 424  | < .001      |
| LH         | V3          | dorsal  | - RH       | V3          | dorsal  | 3.3062     | 0.524 | 6.3129   | 1212 | < .001      |
| LH         | V3          | dorsal  | - RH       | V3          | ventral | 3.1022     | 0.565 | 5.4861   | 647  | < .001      |
| LH         | V3          | ventral | - RH       | V3          | ventral | -0.1815    | 0.523 | -0.3473  | 1205 | 1.000       |
| RH         | V1          | dorsal  | - LH       | V1          | ventral | 0.9053     | 0.562 | 1.6096   | 662  | 1.000       |
| RH         | V1          | dorsal  | - LH       | V2          | dorsal  | -5.7738    | 0.597 | -9.6777  | 712  | < .001      |
| RH         | V1          | dorsal  | - LH       | V2          | ventral | -2.0837    | 0.587 | -3.5519  | 400  | 0.028       |
| RH         | V1          | dorsal  | - LH       | V3          | dorsal  | -6.3050    | 0.546 | -11.5416 | 698  | < .001      |
| RH         | V1          | dorsal  | - LH       | V3          | ventral | -3.0213    | 0.571 | -5.2875  | 399  | < .001      |
| RH         | V1          | dorsal  | - RH       | V1          | ventral | 1.7834     | 0.524 | 3.4022   | 1164 | 0.046       |
| RH         | V1          | dorsal  | - RH       | V2          | dorsal  | -0.1901    | 0.528 | -0.3598  | 1187 | 1.000       |
| RH         | V1          | dorsal  | - RH       | V2          | ventral | -1.0493    | 0.536 | -1.9568  | 627  | 1.000       |
| RH         | V1          | dorsal  | - RH       | V3          | dorsal  | -2.9988    | 0.527 | -5.6887  | 1176 | < .001      |
| RH         | V1          | dorsal  | - RH       | V3          | ventral | -3.2028    | 0.549 | -5.8363  | 595  | < .001      |
| RH         | V1          | ventral | - LH       | V2          | ventral | -3.8671    | 0.583 | -6.6282  | 669  | < .001      |
| RH         | V1          | ventral | - LH       | V3          | ventral | -4.8046    | 0.553 | -8.6948  | 717  | < .001      |
| RH         | V1          | ventral | - RH       | V2          | ventral | -2.8326    | 0.528 | -5.3677  | 1177 | < .001      |
| RH         | V1          | ventral | - RH       | V3          | ventral | -4.9861    | 0.529 | -9.4168  | 1182 | < .001      |
| RH         | V2          | dorsal  | - LH       | V1          | ventral | 1.0954     | 0.623 | 1.7581   | 445  | 1.000       |
| RH         | V2          | dorsal  | - LH       | V2          | ventral | -1.8936    | 0.561 | -3.3755  | 657  | 0.051       |
| RH         | V2          | dorsal  | - LH       | V3          | dorsal  | -6.1149    | 0.516 | -11.8463 | 773  | < .001      |

| Comparison |             |         |            |             |         | Difference | SE    | t       | df   | Pbonferroni |
|------------|-------------|---------|------------|-------------|---------|------------|-------|---------|------|-------------|
| Hemisphere | Visual area | Half    | Hemisphere | Visual area | Half    |            |       |         |      |             |
| RH         | V2          | dorsal  | - LH       | V3          | ventral | -2.8312    | 0.561 | -5.0507 | 402  | < .001      |
| RH         | V2          | dorsal  | - RH       | V1          | ventral | 1.9735     | 0.597 | 3.3038  | 657  | 0.066       |
| RH         | V2          | dorsal  | - RH       | V2          | ventral | -0.8592    | 0.525 | -1.6355 | 1167 | 1.000       |
| RH         | V2          | dorsal  | - RH       | V3          | dorsal  | -2.8087    | 0.491 | -5.7247 | 1249 | < .001      |
| RH         | V2          | dorsal  | - RH       | V3          | ventral | -3.0126    | 0.542 | -5.5594 | 581  | < .001      |
| RH         | V2          | ventral | - LH       | V3          | ventral | -1.9720    | 0.506 | -3.9003 | 729  | 0.007       |
| RH         | V2          | ventral | - RH       | V3          | ventral | -2.1535    | 0.484 | -4.4515 | 1212 | < .001      |
| RH         | V3          | dorsal  | - LH       | V1          | ventral | 3.9041     | 0.635 | 6.1505  | 442  | < .001      |
| RH         | V3          | dorsal  | - LH       | V2          | ventral | 0.9151     | 0.575 | 1.5907  | 372  | 1.000       |
| RH         | V3          | dorsal  | - LH       | V3          | ventral | -0.0225    | 0.565 | -0.0398 | 672  | 1.000       |
| RH         | V3          | dorsal  | - RH       | V1          | ventral | 4.7822     | 0.591 | 8.0918  | 708  | < .001      |
| RH         | V3          | dorsal  | - RH       | V2          | ventral | 1.9495     | 0.518 | 3.7645  | 664  | 0.012       |
| RH         | V3          | dorsal  | - RH       | V3          | ventral | -0.2039    | 0.524 | -0.3893 | 1163 | 1.000       |

## References

- [1] The jamovi project (2022). *jamovi*. (Version 2.3) [Computer Software]. Retrieved from <https://www.jamovi.org>.
- [2] R Core Team (2021). *R: A Language and environment for statistical computing*. (Version 4.1) [Computer software]. Retrieved from <https://cran.r-project.org>. (R packages retrieved from MRAN snapshot 2022-01-01).
- [3] Gallucci, M. (2019). *GAMLj: General analyses for linear models*. [jamovi module]. Retrieved from <https://gamlj.github.io/>.
